# Supplementary material for: Excited-State Polarizabilities: A Combined Density Functional Theory and Information-Theoretic Approach Study
Source: MDPI journal article supplement (doi:10.3390/molecules28062576), 2023-03-12
Supplement: s1 [file s1]

# **Excited-State Polarizabilities: A Combined Density Functional Theory and Information-Theoretic Approach Study**

Dongbo Zhao<sup>1</sup>, Xin He<sup>2</sup>, Paul W. Ayers,<sup>3,\*</sup> and Shubin Liu<sup>4,5,\*</sup>

<sup>1</sup> Institute of Biomedical Research, Yunnan University, Kunming 650500, China

<sup>2</sup> Qingdao Institute for Theoretical and Computational Sciences, Shandong University, Qingdao 266237, China

<sup>3</sup> Department of Chemistry and Chemical Biology, McMaster University, Hamilton, ONL8S 4M1, Canada

<sup>4</sup> Research Computing Center, University of North Carolina, Chapel Hill, NC 27599-3420, USA

<sup>5</sup> Department of Chemistry, University of North Carolina, Chapel Hill, NC 27599-3290, USA

\*Correspondence: ayers@mcmaster.ca (P.W.A.); shubin@email.unc.edu (S.L.)

**Table S1.** Linear regression equations between the  $S_0$  polarizabilities ( $\alpha_{iso}$ ) and molecular volumes (Vol), molecular quadrupole moments ( $\Theta_{iso}$ ), and ITA quantities for all the systems in Schemes 1 and 2.

| $S_0$          | $\alpha_{iso}$          |
|----------------|-------------------------|
| $S_5$          | $y = 0.9403x + 111.41$  |
| $I_F$          | $y = 0.0048x + 178.92$  |
| $S_{GBP}$      | $y = 0.2564x - 26.518$  |
| ${}^1R_2$      | $y = 1.6976x - 26.078$  |
| ${}^1R_3$      | $y = 1.6255x - 25.966$  |
| $I_G$          | $y = 115.99x + 20.233$  |
| $G_1$          | $y = -3.9841x + 41.292$ |
| $G_2$          | $y = 5.1989x + 62.811$  |
| $G_3$          | $y = 1.2932x - 3.9792$  |
| Vol            | $y = 0.0836x + 30.412$  |
| $\Theta_{iso}$ | $y = -2.0683x - 15.249$ |

**Table S2.** Linear regression equations between the  $S_1$  polarizabilities ( $\alpha_{iso}$ ) and molecular volumes (Vol), molecular quadrupole moments ( $\Theta_{iso}$ ), and ITA quantities for all the systems in Schemes 1 and 2.

| $S_1$          | $\alpha_{iso}$          |
|----------------|-------------------------|
| $S_5$          | $y = 0.9888x + 105.09$  |
| $I_F$          | $y = 0.0031x + 188.9$   |
| $^1R_2$        | $y = 1.6187x - 15.934$  |
| $^1R_3$        | $y = 1.5517x - 16.217$  |
| $G_2$          | $y = 5.3296x + 58.111$  |
| $G_3$          | $y = 1.2826x - 1.087$   |
| Vol            | $y = 0.105x - 9.5127$   |
| $\Theta_{iso}$ | $y = -1.9814x - 8.2371$ |

**Table S3.** Excited-state ITA quantities (in a.u.), molecular volume (Vol, in Bohr<sup>3</sup>/mol), and molecular quadrupole moment ( $\Theta_{\text{iso}}$ , in a.u.), based on the  $S_0$  geometry with the transition density matrix as an input for all the systems in Schemes 1 and 2.

| index | S <sub>s</sub> | I <sub>F</sub> | S <sub>GBP</sub> | <sup>1</sup> R <sub>2</sub> | <sup>1</sup> R <sub>3</sub> | I <sub>G</sub> | G <sub>1</sub> | G <sub>2</sub> | G <sub>3</sub> | Vol     | $\Theta_{\text{iso}}$ |
|-------|----------------|----------------|------------------|-----------------------------|-----------------------------|----------------|----------------|----------------|----------------|---------|-----------------------|
| 1     | 96.62          | 4343.66        | 747.19           | 112.60                      | 117.73                      | 1.36           | -35.10         | 23.95          | 139.60         | 1752.73 | -91.17                |
| 2     | 20.91          | 13967.03       | 974.35           | 146.55                      | 151.56                      | 1.33           | -34.68         | 23.61          | 141.54         | 2067.93 | -111.17               |
| 3     | 143.16         | 5692.57        | 1017.29          | 154.00                      | 161.88                      | 2.08           | -50.74         | 34.87          | 195.88         | 2360.41 | -124.96               |
| 4     | 98.03          | 4793.24        | 802.00           | 120.73                      | 126.10                      | 1.43           | -34.22         | 22.38          | 147.61         | 1746.57 | -96.87                |
| 5     | 108.23         | 5045.39        | 855.88           | 129.04                      | 135.06                      | 1.58           | -38.87         | 25.61          | 159.66         | 1968.24 | -101.90               |
| 6     | 93.25          | 4917.75        | 802.25           | 120.55                      | 125.53                      | 1.33           | -34.34         | 22.72          | 143.99         | 1682.49 | -97.61                |
| 7     | 81.99          | 6523.98        | 855.67           | 128.54                      | 133.50                      | 1.32           | -34.65         | 22.09          | 141.99         | 1893.44 | -105.01               |
| 8     | 20.86          | 13966.83       | 974.31           | 146.55                      | 151.55                      | 1.33           | -34.70         | 23.58          | 141.63         | 1949.76 | -108.42               |
| 9     | 102.64         | 4928.22        | 829.73           | 124.72                      | 130.02                      | 1.42           | -36.45         | 23.07          | 150.98         | 1961.87 | -110.89               |
| 10    | 106.75         | 4595.15        | 801.16           | 120.89                      | 126.54                      | 1.51           | -38.84         | 25.82          | 150.78         | 1959.19 | -97.32                |
| 11    | 108.29         | 5045.38        | 855.91           | 128.99                      | 134.82                      | 1.56           | -38.84         | 23.73          | 159.47         | 1869.73 | -97.78                |
| 12    | 81.97          | 6524.04        | 855.65           | 128.58                      | 133.67                      | 1.34           | -34.70         | 22.48          | 142.14         | 1804.34 | -105.88               |
| 13    | 20.92          | 13967.07       | 974.34           | 146.59                      | 151.71                      | 1.35           | -34.76         | 22.69          | 141.71         | 1920.89 | -109.93               |
| 14    | 102.61         | 4928.35        | 829.69           | 124.75                      | 130.11                      | 1.44           | -36.47         | 23.40          | 151.04         | 1982.69 | -114.69               |
| 15    | 106.74         | 4595.21        | 801.16           | 120.89                      | 126.62                      | 1.51           | -38.89         | 24.50          | 150.86         | 2011.10 | -96.98                |
| 16    | 96.60          | 6318.28        | 966.13           | 144.77                      | 150.18                      | 1.45           | -37.41         | 23.14          | 164.95         | 2068.91 | -115.89               |
| 17    | 135.43         | 5825.99        | 1018.15          | 153.64                      | 160.79                      | 1.89           | -52.49         | 36.56          | 192.01         | 2337.67 | -124.54               |
| 18    | 135.35         | 5825.83        | 1018.08          | 153.64                      | 160.85                      | 1.89           | -52.56         | 36.86          | 192.38         | 2494.60 | -121.81               |
| 19    | 147.02         | 6527.75        | 1126.86          | 170.06                      | 178.02                      | 2.11           | -56.25         | 38.42          | 212.03         | 2463.13 | -132.50               |
| 20    | 153.40         | 7224.94        | 1222.48          | 184.28                      | 192.65                      | 2.23           | -58.67         | 39.73          | 226.62         | 2664.72 | -147.18               |
| 21    | 146.95         | 6527.57        | 1126.80          | 170.07                      | 178.12                      | 2.12           | -56.26         | 39.01          | 212.40         | 2649.40 | -129.04               |
| 22    | 153.33         | 7224.81        | 1222.41          | 184.28                      | 192.70                      | 2.23           | -58.74         | 39.64          | 226.87         | 2985.18 | -138.77               |
| 23    | 92.09          | 6775.55        | 909.62           | 136.86                      | 142.49                      | 1.49           | -38.38         | 26.23          | 153.09         | 2148.93 | -112.14               |
| 24    | 106.73         | 6569.76        | 1020.10          | 153.06                      | 159.01                      | 1.60           | -41.10         | 26.28          | 176.00         | 2015.49 | -121.95               |
| 25    | 174.15         | 7308.13        | 1289.03          | 194.68                      | 203.90                      | 2.43           | -69.91         | 50.12          | 244.61         | 2925.68 | -155.40               |
| 26    | 191.13         | 7329.96        | 1328.91          | 201.27                      | 211.66                      | 2.74           | -74.36         | 52.65          | 255.14         | 3424.82 | -165.98               |
| 27    | 83.02          | 6639.96        | 967.30           | 144.45                      | 149.26                      | 1.28           | -32.81         | 20.06          | 158.31         | 1847.01 | -115.66               |
| 28    | 96.94          | 4012.13        | 706.64           | 106.60                      | 111.72                      | 1.35           | -37.28         | 25.87          | 130.48         | 1765.68 | -83.35                |
| 29    | 92.07          | 4452.93        | 747.59           | 112.51                      | 117.43                      | 1.31           | -35.58         | 24.40          | 137.22         | 1682.22 | -87.76                |
| 30    | 80.88          | 5927.25        | 801.12           | 120.50                      | 125.41                      | 1.30           | -36.23         | 25.64          | 133.52         | 1736.76 | -94.74                |
| 31    | 90.33          | 4002.49        | 692.60           | 104.45                      | 109.27                      | 1.27           | -35.88         | 24.86          | 129.30         | 1563.76 | -83.12                |
| 32    | 103.87         | 4822.52        | 815.58           | 122.93                      | 128.65                      | 1.53           | -41.03         | 28.13          | 147.55         | 1755.98 | -95.54                |
| 33    | 128.46         | 5901.68        | 1004.89          | 151.69                      | 158.91                      | 1.93           | -48.71         | 32.03          | 187.26         | 2350.61 | -114.02               |
| 34    | 113.38         | 5647.72        | 937.82           | 141.10                      | 147.14                      | 1.62           | -43.86         | 30.61          | 168.65         | 2239.20 | -113.69               |
| 35    | 69.02          | 3451.38        | 571.43           | 85.89                       | 89.61                       | 0.99           | -21.16         | 12.72          | 104.61         | 1341.88 | -67.19                |
| 36    | 75.05          | 4146.01        | 667.18           | 100.00                      | 103.77                      | 1.07           | -21.02         | 12.06          | 117.05         | 1405.54 | -78.59                |

**Table S4.** Linear regression equations between the  $S_1$  polarizabilities  $\alpha_{\text{iso}}@S_1$  and the  $S_0$  polarizabilities  $\alpha_{\text{iso}}@S_0$ , Vol@ $S_0$ ,  $\Theta_{\text{iso}}@S_0$ , and ITA quantities@ $S_0$  for all the systems in Schemes 1 and 2.

|                           | $\alpha_{\text{iso}}@S_1$ |
|---------------------------|---------------------------|
| $\alpha_{\text{iso}}@S_0$ | $y = 0.9729x + 4.9352$    |
| $S_5@S_0$                 | $y = 0.9888x + 105.62$    |
| $I_F@S_0$                 | $y = 0.0031x + 188.9$     |
| $S_{\text{GBP}}@S_0$      | $y = 0.2445x - 16.31$     |
| $^1R_2@S_0$               | $y = 1.6202x - 16.071$    |
| $^1R_3@S_0$               | $y = 1.5553x - 16.542$    |
| $I_G@S_0$                 | $y = 115.7x + 19.988$     |
| $G_1@S_0$                 | $y = -4.0048x + 39.69$    |
| $G_2@S_0$                 | $y = 5.2401x + 60.918$    |
| $G_3@S_0$                 | $y = 1.279x - 2.3708$     |
| Vol@ $S_0$                | $y = 0.0865x + 23.472$    |
| $\Theta_{\text{iso}}@S_0$ | $y = -1.9218x - 0.0716$   |

**Table S5.** Linear regression equations between the  $\alpha_{\text{iso}}@S_0/S_1$  and ITA quantities based on the transition density matrix for all the systems in Schemes 1 and 2.

|                             | $\alpha_{\text{iso}}@S_0$ | $\alpha_{\text{iso}}@S_1$ |
|-----------------------------|---------------------------|---------------------------|
| S <sub>S</sub>              | $y = 0.9404x + 111.18$    | $y = 0.9886x + 105.41$    |
| I <sub>F</sub>              | $y = 0.0048x + 178.92$    | $y = 0.0031x + 188.9$     |
| S <sub>GBP</sub>            | $y = 0.2564x - 26.625$    | $y = 0.2445x - 16.402$    |
| <sup>r</sup> R <sub>2</sub> | $y = 1.6974x - 25.972$    | $y = 1.6201x - 15.981$    |
| <sup>r</sup> R <sub>3</sub> | $y = 1.6247x - 25.688$    | $y = 1.5547x - 16.293$    |
| I <sub>G</sub>              | $y = 115.72x + 23.765$    | $y = 115.65x + 23.141$    |
| G <sub>1</sub>              | $y = -3.9604x + 43.674$   | $y = -3.9741x + 42.372$   |
| G <sub>2</sub>              | $y = 5.1788x + 64.117$    | $y = 5.2107x + 62.494$    |
| G <sub>3</sub>              | $y = 1.2918x - 3.4076$    | $y = 1.2776x - 1.7986$    |
| Vol                         | $y = 0.1028x - 4.2832$    | $y = 0.1025x - 4.2863$    |
| $\Theta_{\text{iso}}$       | $y = -2.1386x - 26.46$    | $y = -1.9621x - 7.735$    |

**Table S6.** Molecular polarizabilities ( $\alpha_{\text{iso}}$ , in Bohr<sup>3</sup>/mol) at S<sub>0</sub>/S<sub>1</sub> predicted by the original TS formula with conventional data as a reference for all the systems in Schemes 1 and 2

| index | Ground-state (S <sub>0</sub> ) |           |        | Excited-state (S <sub>1</sub> ) |           |        |
|-------|--------------------------------|-----------|--------|---------------------------------|-----------|--------|
|       | Becke                          | Hirshfeld | avg.   | Becke                           | Hirshfeld | avg.   |
| 1     | 119.84                         | 176.99    | 148.41 | 121.05                          | 176.63    | 148.84 |
| 2     | 228.99                         | 281.15    | 255.07 | 228.53                          | 279.36    | 253.95 |
| 3     | 167.92                         | 250.19    | 209.05 | 169.26                          | 249.87    | 209.56 |
| 4     | 122.82                         | 182.28    | 152.55 | 124.20                          | 182.08    | 153.14 |
| 5     | 132.97                         | 197.56    | 165.27 | 134.35                          | 197.34    | 165.84 |
| 6     | 119.40                         | 177.07    | 148.24 | 120.98                          | 177.15    | 149.06 |
| 7     | 170.42                         | 224.86    | 197.64 | 170.23                          | 223.53    | 196.88 |
| 8     | 229.52                         | 281.83    | 255.67 | 227.91                          | 279.02    | 253.46 |
| 9     | 129.98                         | 189.98    | 159.98 | 131.48                          | 190.06    | 160.77 |
| 10    | 129.77                         | 192.41    | 161.09 | 131.17                          | 192.26    | 161.72 |
| 11    | 132.81                         | 197.40    | 165.11 | 134.35                          | 197.35    | 165.85 |
| 12    | 169.65                         | 224.32    | 196.98 | 172.04                          | 224.59    | 198.32 |
| 13    | 227.44                         | 279.92    | 253.68 | 231.41                          | 281.70    | 256.56 |
| 14    | 130.12                         | 190.12    | 160.12 | 131.17                          | 189.61    | 160.39 |
| 15    | 129.85                         | 192.48    | 161.16 | 131.10                          | 192.26    | 161.68 |
| 16    | 130.63                         | 194.40    | 162.51 | 131.24                          | 193.58    | 162.41 |
| 17    | 167.50                         | 248.17    | 207.83 | 168.68                          | 247.78    | 208.23 |
| 18    | 167.20                         | 248.13    | 207.66 | 168.36                          | 247.93    | 208.14 |
| 19    | 180.67                         | 268.74    | 224.70 | 181.79                          | 268.33    | 225.06 |
| 20    | 190.15                         | 282.83    | 236.49 | 191.24                          | 282.39    | 236.82 |
| 21    | 180.36                         | 268.73    | 224.55 | 181.54                          | 268.42    | 224.98 |
| 22    | 189.86                         | 282.78    | 236.32 | 190.76                          | 283.63    | 237.19 |
| 23    | 179.61                         | 239.76    | 209.69 | 182.19                          | 240.24    | 211.21 |
| 24    | 140.56                         | 209.82    | 175.19 | 141.35                          | 209.19    | 175.27 |
| 25    | 214.86                         | 319.29    | 267.08 | 214.84                          | 321.13    | 267.99 |
| 26    | 226.85                         | 337.95    | 282.40 | 228.26                          | 337.38    | 282.82 |
| 27    | 119.65                         | 177.97    | 148.81 | 121.63                          | 179.51    | 150.57 |
| 28    | 117.98                         | 188.56    | 153.27 | 118.75                          | 189.70    | 154.22 |
| 29    | 115.94                         | 188.79    | 152.37 | 116.85                          | 189.46    | 153.16 |
| 30    | 128.51                         | 201.46    | 164.98 | 129.20                          | 200.89    | 165.04 |
| 31    | 111.83                         | 182.36    | 147.09 | 112.99                          | 183.35    | 148.17 |
| 32    | 123.89                         | 206.03    | 164.96 | 124.51                          | 205.72    | 165.11 |
| 33    | 155.45                         | 257.82    | 206.64 | 156.23                          | 258.52    | 207.38 |
| 34    | 140.32                         | 232.91    | 186.61 | 140.95                          | 233.78    | 187.37 |
| 35    | 86.39                          | 136.74    | 111.56 | 88.03                           | 138.47    | 113.25 |
| 36    | 95.21                          | 153.62    | 124.41 | 95.38                           | 154.09    | 124.74 |

**Table S7.** Molecular polarizabilities ( $\alpha_{\text{iso}}$ , in Bohr<sup>3</sup>/mol) at S<sub>0</sub>/S<sub>1</sub> predicted by the new TS formula with conventional data as a reference for all the systems in Schemes 1 and 2

| index | Ground-state (S <sub>0</sub> ) |           |        | Excited-state (S <sub>1</sub> ) |           |        |
|-------|--------------------------------|-----------|--------|---------------------------------|-----------|--------|
|       | Becke                          | Hirshfeld | avg.   | Becke                           | Hirshfeld | avg.   |
| 1     | 119.84                         | 176.99    | 148.41 | 121.05                          | 176.63    | 148.84 |
| 2     | 228.99                         | 281.15    | 255.07 | 228.53                          | 279.36    | 253.95 |
| 3     | 167.92                         | 250.19    | 209.05 | 169.26                          | 249.87    | 209.56 |
| 4     | 122.82                         | 182.28    | 152.55 | 124.20                          | 182.08    | 153.14 |
| 5     | 132.97                         | 197.56    | 165.27 | 134.35                          | 197.34    | 165.84 |
| 6     | 119.40                         | 177.07    | 148.24 | 120.98                          | 177.15    | 149.06 |
| 7     | 170.42                         | 224.86    | 197.64 | 170.23                          | 223.53    | 196.88 |
| 8     | 229.52                         | 281.83    | 255.67 | 227.91                          | 279.02    | 253.46 |
| 9     | 129.98                         | 189.98    | 159.98 | 131.48                          | 190.06    | 160.77 |
| 10    | 129.77                         | 192.41    | 161.09 | 131.17                          | 192.26    | 161.72 |
| 11    | 132.81                         | 197.40    | 165.11 | 134.35                          | 197.35    | 165.85 |
| 12    | 169.65                         | 224.32    | 196.98 | 172.04                          | 224.59    | 198.32 |
| 13    | 227.44                         | 279.92    | 253.68 | 231.41                          | 281.70    | 256.56 |
| 14    | 130.12                         | 190.12    | 160.12 | 131.17                          | 189.61    | 160.39 |
| 15    | 129.85                         | 192.48    | 161.16 | 131.10                          | 192.26    | 161.68 |
| 16    | 130.63                         | 194.40    | 162.51 | 131.24                          | 193.58    | 162.41 |
| 17    | 167.50                         | 248.17    | 207.83 | 168.68                          | 247.78    | 208.23 |
| 18    | 167.20                         | 248.13    | 207.66 | 168.36                          | 247.93    | 208.14 |
| 19    | 180.67                         | 268.74    | 224.70 | 181.79                          | 268.33    | 225.06 |
| 20    | 190.15                         | 282.83    | 236.49 | 191.24                          | 282.39    | 236.82 |
| 21    | 180.36                         | 268.73    | 224.55 | 181.54                          | 268.42    | 224.98 |
| 22    | 189.86                         | 282.78    | 236.32 | 190.76                          | 283.63    | 237.19 |
| 23    | 179.61                         | 239.76    | 209.69 | 182.19                          | 240.24    | 211.21 |
| 24    | 140.56                         | 209.82    | 175.19 | 141.35                          | 209.19    | 175.27 |
| 25    | 214.86                         | 319.29    | 267.08 | 214.84                          | 321.13    | 267.99 |
| 26    | 226.85                         | 337.95    | 282.40 | 228.26                          | 337.38    | 282.82 |
| 27    | 119.65                         | 177.97    | 148.81 | 121.63                          | 179.51    | 150.57 |
| 28    | 100.17                         | 183.02    | 141.59 | 101.03                          | 184.50    | 142.76 |
| 29    | 98.36                          | 184.42    | 141.39 | 99.36                           | 185.29    | 142.32 |
| 30    | 110.44                         | 196.70    | 153.57 | 111.04                          | 196.11    | 153.58 |
| 31    | 94.34                          | 177.54    | 135.94 | 95.61                           | 178.80    | 137.20 |
| 32    | 103.91                         | 200.37    | 152.14 | 104.49                          | 199.99    | 152.24 |
| 33    | 131.32                         | 251.24    | 191.28 | 132.17                          | 252.12    | 192.15 |
| 34    | 118.91                         | 227.28    | 173.09 | 119.56                          | 228.50    | 174.03 |
| 35    | 74.15                          | 133.30    | 103.72 | 76.08                           | 135.55    | 105.81 |
| 36    | 81.89                          | 150.39    | 116.14 | 81.99                           | 151.00    | 116.49 |



Cartesian coordinates optimized at the CAM-B3LYP/6-311+G(d) level

| 26 |          |          |          |
|----|----------|----------|----------|
| 1  |          |          |          |
| C  | 1.85598  | 0.58956  | -0.00015 |
| C  | 3.22436  | -1.39818 | 0.00039  |
| C  | 4.34370  | -0.63354 | 0.00024  |
| C  | 4.24113  | 0.78375  | -0.00011 |
| C  | 3.01965  | 1.38770  | -0.00030 |
| C  | -0.13442 | -0.25313 | -0.00001 |
| C  | 0.72884  | -1.32570 | 0.00029  |
| H  | 3.22658  | -2.47964 | 0.00065  |
| H  | 5.31191  | -1.11632 | 0.00039  |
| H  | 5.14365  | 1.38262  | -0.00023 |
| H  | 2.90424  | 2.46360  | -0.00057 |
| H  | 0.56850  | -2.38996 | 0.00059  |
| N  | 1.99656  | -0.79204 | 0.00020  |
| N  | 0.57604  | 0.91819  | -0.00027 |
| C  | -1.59991 | -0.25338 | -0.00005 |
| C  | -2.31178 | -1.45782 | -0.00011 |
| C  | -2.32937 | 0.95069  | -0.00002 |
| C  | -3.69174 | -1.49056 | -0.00010 |
| H  | -1.76322 | -2.39371 | -0.00018 |
| C  | -3.72485 | 0.91407  | -0.00001 |
| C  | -4.39904 | -0.28972 | -0.00004 |
| H  | -4.21526 | -2.43927 | -0.00014 |
| H  | -4.25321 | 1.86009  | 0.00003  |
| H  | -5.48357 | -0.29658 | -0.00003 |
| O  | -1.75109 | 2.16494  | 0.00000  |
| H  | -0.77442 | 2.06413  | -0.00013 |

| 26 |          |          |          |
|----|----------|----------|----------|
| 2  |          |          |          |
| C  | -3.36093 | 0.56690  | 0.00001  |
| C  | -4.67708 | -1.45576 | 0.00003  |
| C  | -5.81550 | -0.72027 | 0.00003  |
| C  | -5.74970 | 0.69929  | 0.00001  |
| C  | -4.54468 | 1.33504  | -0.00000 |
| C  | -1.35009 | -0.22431 | 0.00002  |
| C  | -2.18433 | -1.31887 | 0.00003  |
| H  | -4.65107 | -2.53687 | 0.00005  |
| H  | -6.77094 | -1.22778 | 0.00003  |
| H  | -6.66753 | 1.27437  | 0.00000  |
| H  | -4.45737 | 2.41355  | -0.00002 |

|    |          |          |          |
|----|----------|----------|----------|
| H  | -1.99681 | -2.37875 | 0.00003  |
| N  | -3.46532 | -0.81746 | 0.00003  |
| N  | -2.08960 | 0.92849  | -0.00000 |
| C  | 0.11423  | -0.18263 | 0.00002  |
| C  | 0.86416  | -1.36135 | 0.00000  |
| C  | 0.80757  | 1.04296  | 0.00002  |
| C  | 2.24474  | -1.36019 | -0.00002 |
| H  | 0.34941  | -2.31584 | 0.00000  |
| C  | 2.20401  | 1.05467  | -0.00000 |
| C  | 2.89941  | -0.13368 | -0.00002 |
| H  | 2.80242  | -2.28698 | -0.00003 |
| O  | 0.19635  | 2.23707  | 0.00005  |
| H  | 2.70863  | 2.01170  | 0.00000  |
| Br | 4.80185  | -0.09673 | -0.00004 |
| H  | -0.77851 | 2.10762  | 0.00009  |

40

3

|   |          |          |          |
|---|----------|----------|----------|
| C | -3.53893 | 0.55033  | 0.00009  |
| C | -4.81954 | -1.49493 | -0.00026 |
| C | -5.97122 | -0.77976 | -0.00014 |
| C | -5.93035 | 0.64056  | 0.00011  |
| C | -4.73622 | 1.29706  | 0.00022  |
| C | -1.51354 | -0.20490 | -0.00004 |
| C | -2.32939 | -1.31409 | -0.00023 |
| H | -4.77476 | -2.57547 | -0.00045 |
| H | -6.91751 | -1.30421 | -0.00022 |
| H | -6.85805 | 1.19966  | 0.00020  |
| H | -4.66772 | 2.37696  | 0.00040  |
| H | -2.12277 | -2.37037 | -0.00041 |
| N | -3.61934 | -0.83607 | -0.00015 |
| N | -2.27447 | 0.93444  | 0.00015  |
| C | -0.05031 | -0.14008 | -0.00003 |
| C | 0.71876  | -1.30901 | -0.00027 |
| C | 0.62797  | 1.09220  | 0.00022  |
| C | 2.09730  | -1.27936 | -0.00026 |
| H | 0.21600  | -2.27047 | -0.00048 |
| C | 2.02400  | 1.11661  | 0.00023  |
| C | 2.76325  | -0.04856 | -0.00001 |
| H | 2.65787  | -2.20687 | -0.00046 |
| H | 2.52735  | 2.07516  | 0.00043  |
| O | -0.00060 | 2.28098  | 0.00047  |
| N | 4.19888  | 0.03852  | 0.00002  |
| C | 4.81062  | -0.50513 | -1.21243 |

|   |          |          |          |
|---|----------|----------|----------|
| H | 5.89217  | -0.39699 | -1.09561 |
| H | 4.61690  | -1.58684 | -1.31601 |
| C | 4.36863  | 0.21748  | -2.47337 |
| H | 4.58206  | 1.28561  | -2.40031 |
| H | 4.89939  | -0.18083 | -3.34132 |
| H | 3.29911  | 0.10053  | -2.65466 |
| C | 4.81062  | -0.50572 | 1.21219  |
| H | 4.61691  | -1.58749 | 1.31525  |
| H | 5.89217  | -0.39752 | 1.09543  |
| C | 4.36863  | 0.21627  | 2.47349  |
| H | 4.58207  | 1.28443  | 2.40096  |
| H | 3.29910  | 0.09924  | 2.65471  |
| H | 4.89936  | -0.18248 | 3.34125  |
| H | -0.97187 | 2.13815  | 0.00043  |

27

4

|   |          |          |          |
|---|----------|----------|----------|
| C | 2.25803  | 0.58123  | -0.00003 |
| C | 3.60812  | -1.41782 | 0.00003  |
| C | 4.73498  | -0.66335 | -0.00001 |
| C | 4.64499  | 0.75411  | -0.00005 |
| C | 3.42827  | 1.36875  | -0.00006 |
| C | 0.25890  | -0.24415 | 0.00001  |
| C | 1.11325  | -1.32425 | 0.00004  |
| H | 3.60077  | -2.49927 | 0.00006  |
| H | 5.69867  | -1.15510 | 0.00000  |
| H | 5.55256  | 1.34533  | -0.00008 |
| H | 3.32258  | 2.44566  | -0.00010 |
| H | 0.94379  | -2.38715 | 0.00009  |
| N | 2.38624  | -0.80131 | 0.00001  |
| N | 0.98044  | 0.92101  | -0.00003 |
| C | -1.20359 | -0.22673 | 0.00001  |
| C | -1.94010 | -1.41633 | 0.00004  |
| C | -1.92055 | 0.98490  | -0.00002 |
| C | -3.31726 | -1.43738 | 0.00005  |
| H | -1.41008 | -2.36267 | 0.00006  |
| C | -3.31482 | 0.97229  | -0.00001 |
| C | -4.00496 | -0.22471 | 0.00003  |
| H | -3.87383 | -2.36576 | 0.00008  |
| O | -1.32915 | 2.19045  | -0.00006 |
| H | -3.83086 | 1.92712  | -0.00003 |
| O | -5.36493 | -0.27905 | 0.00004  |
| H | -5.73691 | 0.60892  | 0.00003  |

|   |          |         |          |
|---|----------|---------|----------|
| H | -0.35243 | 2.07460 | -0.00006 |
|---|----------|---------|----------|

|    |  |  |  |
|----|--|--|--|
| 30 |  |  |  |
| 5  |  |  |  |

|   |          |          |          |
|---|----------|----------|----------|
| C | -2.63606 | 0.61229  | -0.00014 |
| C | -4.05484 | -1.33874 | 0.00009  |
| C | -5.15496 | -0.54568 | -0.00001 |
| C | -5.01582 | 0.86778  | -0.00018 |
| C | -3.77844 | 1.43979  | -0.00024 |
| C | -0.66664 | -0.28191 | -0.00003 |
| C | -1.55820 | -1.33178 | 0.00010  |
| H | -4.08505 | -2.41981 | 0.00022  |
| H | -6.13512 | -1.00373 | 0.00005  |
| H | -5.90232 | 1.49017  | -0.00026 |
| H | -3.63542 | 2.51239  | -0.00038 |
| H | -1.42557 | -2.39989 | 0.00026  |
| N | -2.81234 | -0.76513 | 0.00003  |
| N | -1.34761 | 0.90764  | -0.00017 |
| C | 0.79500  | -0.31623 | -0.00002 |
| C | 1.49014  | -1.53324 | -0.00004 |
| C | 1.55596  | 0.86438  | 0.00003  |
| C | 2.86247  | -1.59941 | 0.00000  |
| H | 0.92802  | -2.46095 | -0.00010 |
| C | 2.95252  | 0.80952  | 0.00008  |
| C | 3.60206  | -0.41106 | 0.00006  |
| H | 3.38747  | -2.54618 | -0.00002 |
| H | 3.48109  | 1.75251  | 0.00011  |
| O | 1.00956  | 2.09221  | 0.00004  |
| O | 4.95085  | -0.55433 | 0.00010  |
| C | 5.75124  | 0.60889  | 0.00018  |
| H | 5.57213  | 1.21519  | 0.89258  |
| H | 6.78258  | 0.26393  | 0.00022  |
| H | 5.57221  | 1.21525  | -0.89219 |
| H | 0.02969  | 2.01283  | -0.00005 |

|    |  |  |  |
|----|--|--|--|
| 26 |  |  |  |
| 6  |  |  |  |

|   |          |          |          |
|---|----------|----------|----------|
| C | -2.21599 | 0.54922  | 0.00013  |
| C | -3.37670 | -1.56717 | -0.00015 |
| C | -4.56699 | -0.91928 | -0.00003 |
| C | -4.60811 | 0.50146  | 0.00018  |
| C | -3.45449 | 1.22604  | 0.00026  |
| C | -0.15247 | -0.08828 | -0.00000 |
| C | -0.90152 | -1.24273 | -0.00015 |

|   |          |          |          |
|---|----------|----------|----------|
| H | -3.26940 | -2.64326 | -0.00031 |
| H | -5.48163 | -1.49710 | -0.00010 |
| H | -5.56666 | 1.00575  | 0.00027  |
| H | -3.44849 | 2.30806  | 0.00042  |
| H | -0.63412 | -2.28539 | -0.00031 |
| N | -2.21627 | -0.83938 | -0.00007 |
| N | -0.97589 | 1.00581  | 0.00018  |
| C | 1.30530  | 0.06024  | -0.00002 |
| C | 2.12803  | -1.07227 | -0.00020 |
| C | 1.90972  | 1.33060  | 0.00015  |
| C | 3.49213  | -0.93530 | -0.00022 |
| H | 1.70534  | -2.06965 | -0.00033 |
| C | 3.30198  | 1.43267  | 0.00012  |
| C | 4.10117  | 0.30720  | -0.00006 |
| H | 3.73541  | 2.42529  | 0.00025  |
| H | 5.18188  | 0.38013  | -0.00008 |
| O | 1.21407  | 2.48309  | 0.00034  |
| F | 4.26506  | -2.04825 | -0.00040 |
| H | 0.25235  | 2.28633  | 0.00035  |

|    |          |          |          |
|----|----------|----------|----------|
| 26 |          |          |          |
| 7  |          |          |          |
| C  | 2.57735  | 0.47242  | 0.00009  |
| C  | 3.52470  | -1.74744 | -0.00006 |
| C  | 4.77279  | -1.21941 | 0.00002  |
| C  | 4.95306  | 0.19038  | 0.00013  |
| C  | 3.87609  | 1.02466  | 0.00017  |
| C  | 0.46104  | 0.03998  | 0.00000  |
| C  | 1.09329  | -1.18217 | -0.00007 |
| H  | 3.31230  | -2.80779 | -0.00014 |
| H  | 5.62634  | -1.88415 | -0.00001 |
| H  | 5.95644  | 0.59823  | 0.00019  |
| H  | 3.97632  | 2.10204  | 0.00026  |
| H  | 0.72549  | -2.19378 | -0.00016 |
| N  | 2.44129  | -0.90930 | -0.00002 |
| N  | 1.38770  | 1.04818  | 0.00011  |
| C  | -0.97501 | 0.33342  | -0.00001 |
| C  | -1.90668 | -0.70913 | -0.00006 |
| C  | -1.44857 | 1.65850  | 0.00003  |
| C  | -3.25893 | -0.45103 | -0.00007 |
| H  | -1.56813 | -1.73778 | -0.00010 |
| C  | -2.82375 | 1.89731  | 0.00003  |
| C  | -3.72884 | 0.85664  | -0.00003 |
| H  | -3.15845 | 2.92754  | 0.00006  |

|    |          |          |          |
|----|----------|----------|----------|
| H  | -4.79390 | 1.05230  | -0.00003 |
| O  | -0.64193 | 2.73262  | 0.00007  |
| Cl | -4.39642 | -1.78320 | -0.00014 |
| H  | 0.29606  | 2.43994  | 0.00007  |

26  
8

|    |          |          |          |
|----|----------|----------|----------|
| C  | 2.88003  | -0.71195 | 0.00021  |
| C  | 4.69066  | 0.88305  | 0.00062  |
| C  | 5.58958  | -0.13114 | 0.00059  |
| C  | 5.14507  | -1.48101 | 0.00037  |
| C  | 3.81372  | -1.76997 | 0.00018  |
| C  | 1.15501  | 0.59012  | 0.00019  |
| C  | 2.25271  | 1.42030  | 0.00041  |
| H  | 4.95587  | 1.93143  | 0.00078  |
| H  | 6.64622  | 0.10111  | 0.00073  |
| H  | 5.87484  | -2.28133 | 0.00034  |
| H  | 3.43980  | -2.78533 | 0.00001  |
| H  | 2.35708  | 2.49147  | 0.00056  |
| N  | 3.35189  | 0.59345  | 0.00043  |
| N  | 1.55840  | -0.71830 | 0.00007  |
| C  | -0.26736 | 0.94907  | 0.00008  |
| C  | -0.65748 | 2.28943  | 0.00020  |
| C  | -1.26101 | -0.05217 | -0.00014 |
| C  | -1.98812 | 2.65707  | 0.00010  |
| H  | 0.10367  | 3.06150  | 0.00037  |
| C  | -2.60509 | 0.34065  | -0.00024 |
| C  | -2.96894 | 1.67195  | -0.00012 |
| H  | -2.26947 | 3.70311  | 0.00019  |
| H  | -4.01879 | 1.93697  | -0.00020 |
| O  | -0.98352 | -1.35916 | -0.00026 |
| Br | -3.95024 | -0.99588 | -0.00054 |
| H  | -0.00741 | -1.48821 | -0.00016 |

27  
9

|   |         |          |          |
|---|---------|----------|----------|
| C | 2.44898 | 0.46707  | 0.00004  |
| C | 3.42787 | -1.73884 | -0.00010 |
| C | 4.66779 | -1.19260 | -0.00006 |
| C | 4.82768 | 0.21971  | 0.00004  |
| C | 3.73925 | 1.03868  | 0.00009  |
| C | 0.33946 | 0.00290  | 0.00001  |
| C | 0.98865 | -1.20938 | -0.00008 |
| H | 3.23049 | -2.80204 | -0.00017 |

|   |          |          |          |
|---|----------|----------|----------|
| H | 5.53093  | -1.84475 | -0.00010 |
| H | 5.82512  | 0.64179  | 0.00007  |
| H | 3.82422  | 2.11734  | 0.00016  |
| H | 0.63612  | -2.22649 | -0.00015 |
| N | 2.33248  | -0.91575 | -0.00005 |
| N | 1.25027  | 1.02507  | 0.00008  |
| C | -1.10062 | 0.27901  | 0.00002  |
| C | -2.02263 | -0.76328 | -0.00006 |
| C | -1.58791 | 1.60339  | 0.00011  |
| C | -3.39117 | -0.52822 | -0.00006 |
| H | -1.67234 | -1.78853 | -0.00012 |
| C | -2.96664 | 1.83622  | 0.00010  |
| C | -3.85998 | 0.79119  | 0.00002  |
| H | -3.30446 | 2.86517  | 0.00017  |
| H | -4.92600 | 0.98355  | 0.00002  |
| O | -0.79075 | 2.67537  | 0.00020  |
| C | -4.30617 | -1.62605 | -0.00014 |
| N | -5.03956 | -2.51168 | -0.00021 |
| H | 0.15229  | 2.38876  | 0.00021  |

29

10

|   |          |          |          |
|---|----------|----------|----------|
| C | -2.24173 | 0.53292  | 0.00003  |
| C | -3.36354 | -1.60377 | -0.00003 |
| C | -4.56617 | -0.97810 | 0.00000  |
| C | -4.63325 | 0.44129  | 0.00005  |
| C | -3.49238 | 1.18649  | 0.00006  |
| C | -0.16491 | -0.06640 | -0.00003 |
| C | -0.89440 | -1.23429 | -0.00003 |
| H | -3.23690 | -2.67781 | -0.00006 |
| H | -5.46991 | -1.57289 | -0.00000 |
| H | -5.60071 | 0.92837  | 0.00007  |
| H | -3.50602 | 2.26848  | 0.00009  |
| H | -0.60836 | -2.27183 | -0.00005 |
| N | -2.21677 | -0.85574 | -0.00002 |
| N | -1.01030 | 1.01191  | 0.00002  |
| C | 1.28970  | 0.10911  | -0.00003 |
| C | 2.13993  | -1.00486 | -0.00001 |
| C | 1.86805  | 1.38853  | -0.00003 |
| C | 3.51740  | -0.89766 | 0.00002  |
| H | 1.69757  | -1.99637 | -0.00000 |
| C | 3.25903  | 1.50830  | -0.00001 |
| C | 4.06416  | 0.39021  | 0.00002  |
| H | 3.67984  | 2.50695  | -0.00002 |

|   |         |          |          |
|---|---------|----------|----------|
| H | 5.14318 | 0.51362  | 0.00003  |
| O | 1.15397 | 2.53014  | -0.00010 |
| C | 4.40639 | -2.11249 | 0.00008  |
| H | 3.82233 | -3.03447 | -0.00020 |
| H | 5.05558 | -2.13503 | -0.87929 |
| H | 5.05512 | -2.13528 | 0.87978  |
| H | 0.19628 | 2.31628  | -0.00019 |

30

11

|   |          |          |          |
|---|----------|----------|----------|
| C | -2.63839 | 0.46038  | -0.00003 |
| C | -3.60464 | -1.75171 | -0.00003 |
| C | -4.84858 | -1.21347 | -0.00005 |
| C | -5.01711 | 0.19779  | -0.00006 |
| C | -3.93287 | 1.02280  | -0.00005 |
| C | -0.52563 | 0.01087  | 0.00001  |
| C | -1.16860 | -1.20614 | -0.00001 |
| H | -3.40130 | -2.81388 | -0.00003 |
| H | -5.70757 | -1.87124 | -0.00007 |
| H | -6.01704 | 0.61416  | -0.00007 |
| H | -4.02394 | 2.10104  | -0.00005 |
| H | -0.80758 | -2.22012 | -0.00001 |
| N | -2.51418 | -0.92322 | -0.00002 |
| N | -1.44466 | 1.02636  | -0.00001 |
| C | 0.91436  | 0.28720  | 0.00002  |
| C | 1.82862  | -0.76563 | 0.00002  |
| C | 1.40446  | 1.60745  | 0.00002  |
| C | 3.19501  | -0.54728 | 0.00001  |
| H | 1.48581  | -1.79370 | 0.00003  |
| C | 2.77802  | 1.81707  | 0.00001  |
| C | 3.67362  | 0.76026  | 0.00000  |
| H | 3.13301  | 2.84080  | 0.00001  |
| H | 4.73493  | 0.97101  | -0.00001 |
| O | 0.61004  | 2.69934  | 0.00006  |
| O | 3.98416  | -1.66472 | 0.00000  |
| C | 5.38157  | -1.48864 | 0.00006  |
| H | 5.81286  | -2.48735 | 0.00009  |
| H | 5.71960  | -0.95235 | -0.89241 |
| H | 5.71953  | -0.95233 | 0.89255  |
| H | -0.32912 | 2.41922  | 0.00011  |

26

12

|   |          |         |         |
|---|----------|---------|---------|
| C | -1.02496 | 0.86945 | 0.00024 |
|---|----------|---------|---------|



|    |          |          |          |
|----|----------|----------|----------|
| C  | -2.57142 | -0.98680 | -0.00036 |
| C  | -3.60611 | -0.11157 | -0.00017 |
| C  | -3.38411 | 1.28978  | 0.00023  |
| C  | -2.10987 | 1.77034  | 0.00044  |
| C  | 0.87694  | -0.15487 | 0.00008  |
| C  | -0.08416 | -1.14288 | -0.00028 |
| H  | -2.68910 | -2.06076 | -0.00067 |
| H  | -4.23390 | 1.95962  | 0.00037  |
| H  | -1.89904 | 2.83147  | 0.00075  |
| H  | -0.02446 | -2.21741 | -0.00064 |
| N  | -1.29478 | -0.49293 | -0.00015 |
| N  | 0.27945  | 1.07673  | 0.00037  |
| C  | 2.33519  | -0.29485 | 0.00013  |
| C  | 2.92801  | -1.56249 | 0.00019  |
| C  | 3.17662  | 0.83367  | 0.00007  |
| C  | 4.29813  | -1.72719 | 0.00014  |
| H  | 2.29267  | -2.44174 | 0.00028  |
| C  | 4.56211  | 0.66335  | 0.00002  |
| C  | 5.11734  | -0.59950 | 0.00005  |
| H  | 4.72836  | -2.72160 | 0.00019  |
| H  | 5.17881  | 1.55425  | -0.00003 |
| H  | 6.19613  | -0.71049 | 0.00001  |
| O  | 2.71854  | 2.09824  | 0.00008  |
| Cl | -5.23590 | -0.71992 | -0.00044 |
| H  | 1.73778  | 2.09416  | 0.00031  |

26

13

|   |          |          |          |
|---|----------|----------|----------|
| C | 0.29386  | 0.98681  | 0.00007  |
| C | 1.91774  | -0.80229 | -0.00004 |
| C | 2.91561  | 0.11487  | 0.00001  |
| C | 2.63367  | 1.50625  | 0.00010  |
| C | 1.34002  | 1.93251  | 0.00013  |
| C | -1.56304 | -0.11733 | 0.00001  |
| C | -0.56132 | -1.06360 | -0.00004 |
| H | 2.07505  | -1.87114 | -0.00010 |
| H | 3.45107  | 2.21501  | 0.00014  |
| H | 1.08471  | 2.98390  | 0.00019  |
| H | -0.57543 | -2.13970 | -0.00011 |
| N | 0.62111  | -0.36286 | -0.00001 |
| N | -1.01780 | 1.13884  | 0.00008  |
| C | -3.01414 | -0.31814 | 0.00000  |
| C | -3.55338 | -1.60955 | 0.00007  |
| C | -3.90209 | 0.77414  | -0.00006 |

|    |          |          |          |
|----|----------|----------|----------|
| C  | -4.91534 | -1.83157 | 0.00008  |
| H  | -2.88166 | -2.46131 | 0.00013  |
| C  | -5.27927 | 0.54578  | -0.00005 |
| C  | -5.78108 | -0.73918 | 0.00001  |
| H  | -5.30360 | -2.84311 | 0.00013  |
| H  | -5.93276 | 1.41004  | -0.00010 |
| H  | -6.85428 | -0.89536 | 0.00002  |
| O  | -3.49758 | 2.05684  | -0.00015 |
| Br | 4.71498  | -0.47575 | -0.00003 |
| H  | -2.51746 | 2.09430  | -0.00017 |

27

14

|   |          |          |          |
|---|----------|----------|----------|
| C | 1.16629  | 0.85916  | -0.00002 |
| C | 2.70292  | -1.00083 | -0.00009 |
| C | 3.75457  | -0.13165 | -0.00010 |
| C | 3.52358  | 1.27745  | -0.00007 |
| C | 2.25286  | 1.76026  | -0.00003 |
| C | -0.73639 | -0.16727 | 0.00001  |
| C | 0.22005  | -1.15646 | -0.00004 |
| H | 2.81630  | -2.07595 | -0.00011 |
| H | 4.37253  | 1.94853  | -0.00008 |
| H | 2.04126  | 2.82112  | -0.00001 |
| H | 0.15778  | -2.23080 | -0.00006 |
| N | 1.43521  | -0.50938 | -0.00006 |
| N | -0.13304 | 1.06613  | 0.00001  |
| C | -2.19399 | -0.30106 | 0.00004  |
| C | -2.78942 | -1.56831 | -0.00004 |
| C | -3.03284 | 0.82943  | 0.00015  |
| C | -4.15913 | -1.72999 | -0.00002 |
| H | -2.15626 | -2.44904 | -0.00013 |
| C | -4.41881 | 0.66144  | 0.00017  |
| C | -4.97596 | -0.60003 | 0.00009  |
| H | -4.59162 | -2.72329 | -0.00009 |
| H | -5.03379 | 1.55343  | 0.00026  |
| H | -6.05489 | -0.70893 | 0.00010  |
| O | -2.57511 | 2.09385  | 0.00026  |
| C | 5.08662  | -0.64821 | -0.00014 |
| N | 6.16113  | -1.05421 | -0.00017 |
| H | -1.59558 | 2.09287  | 0.00026  |

29

15

|   |         |         |         |
|---|---------|---------|---------|
| C | 1.41013 | 0.77135 | 0.00003 |
|---|---------|---------|---------|

|   |          |          |          |
|---|----------|----------|----------|
| C | 2.89940  | -1.12847 | 0.00004  |
| C | 3.98555  | -0.31482 | 0.00007  |
| C | 3.77894  | 1.09787  | 0.00009  |
| C | 2.52770  | 1.63286  | 0.00007  |
| C | -0.52513 | -0.18827 | -0.00003 |
| C | 0.40355  | -1.20573 | 0.00000  |
| H | 2.95856  | -2.20895 | 0.00003  |
| H | 4.64445  | 1.75143  | 0.00011  |
| H | 2.35517  | 2.70118  | 0.00008  |
| H | 0.30917  | -2.27790 | 0.00000  |
| N | 1.63511  | -0.59469 | 0.00002  |
| N | 0.11189  | 1.02376  | 0.00001  |
| C | -1.98807 | -0.27906 | -0.00005 |
| C | -2.62493 | -1.52459 | 0.00002  |
| C | -2.79006 | 0.87793  | -0.00010 |
| C | -4.00053 | -1.64178 | 0.00006  |
| H | -2.02007 | -2.42515 | 0.00006  |
| C | -4.18060 | 0.75617  | -0.00006 |
| C | -4.78009 | -0.48670 | 0.00002  |
| H | -4.46487 | -2.62085 | 0.00012  |
| H | -4.76585 | 1.66813  | -0.00011 |
| H | -5.86219 | -0.55990 | 0.00004  |
| O | -2.28643 | 2.12520  | -0.00025 |
| C | 5.37860  | -0.87623 | 0.00010  |
| H | 5.93631  | -0.54621 | -0.87969 |
| H | 5.93626  | -0.54627 | 0.87993  |
| H | 5.37387  | -1.96693 | 0.00006  |
| H | -1.30521 | 2.08326  | -0.00037 |

29

16

|   |          |          |          |
|---|----------|----------|----------|
| C | 0.36293  | 0.97468  | 0.00014  |
| C | 1.96916  | -0.82652 | -0.00028 |
| C | 2.97950  | 0.07834  | -0.00017 |
| C | 2.70329  | 1.47503  | 0.00010  |
| C | 1.41685  | 1.91466  | 0.00025  |
| C | -1.50145 | -0.11914 | 0.00004  |
| C | -0.50909 | -1.07230 | -0.00019 |
| H | 2.11916  | -1.89647 | -0.00049 |
| H | 3.52552  | 2.17962  | 0.00017  |
| H | 1.16768  | 2.96733  | 0.00046  |
| H | -0.53155 | -2.14826 | -0.00039 |
| N | 0.68082  | -0.38059 | -0.00013 |
| N | -0.94413 | 1.13510  | 0.00024  |

|   |          |          |          |
|---|----------|----------|----------|
| C | -2.95382 | -0.30651 | 0.00008  |
| C | -3.50305 | -1.59407 | -0.00014 |
| C | -3.83305 | 0.79277  | 0.00035  |
| C | -4.86634 | -1.80534 | -0.00011 |
| H | -2.83825 | -2.45120 | -0.00035 |
| C | -5.21200 | 0.57496  | 0.00038  |
| C | -5.72351 | -0.70593 | 0.00016  |
| H | -5.26248 | -2.81375 | -0.00028 |
| H | -5.85879 | 1.44420  | 0.00059  |
| H | -6.79785 | -0.85367 | 0.00019  |
| O | -3.42031 | 2.07279  | 0.00057  |
| C | 4.40043  | -0.38569 | -0.00027 |
| F | 5.06870  | 0.06481  | -1.07802 |
| F | 4.50104  | -1.72478 | -0.00096 |
| F | 5.06848  | 0.06366  | 1.07812  |
| H | -2.44085 | 2.10552  | 0.00052  |

36

17

|   |          |          |          |
|---|----------|----------|----------|
| C | -0.23230 | 1.08470  | -0.13534 |
| C | 1.48195  | -0.60242 | 0.06319  |
| C | 2.45970  | 0.33746  | -0.05411 |
| C | 2.07682  | 1.70449  | -0.21338 |
| C | 0.76717  | 2.07254  | -0.25474 |
| C | -2.03017 | -0.10397 | 0.01558  |
| C | -0.98111 | -0.99019 | 0.11794  |
| H | 1.67960  | -1.65472 | 0.21532  |
| H | 2.85161  | 2.45317  | -0.32535 |
| H | 0.46119  | 3.10217  | -0.38576 |
| H | -0.93903 | -2.05782 | 0.24723  |
| N | 0.16429  | -0.23477 | 0.01931  |
| N | -1.55115 | 1.17010  | -0.13994 |
| C | -3.46965 | -0.37561 | 0.05425  |
| C | -3.94393 | -1.68274 | 0.20922  |
| C | -4.41136 | 0.66433  | -0.06199 |
| C | -5.29344 | -1.97000 | 0.25036  |
| H | -3.23013 | -2.49458 | 0.29967  |
| C | -5.77539 | 0.37045  | -0.01987 |
| C | -6.21274 | -0.92905 | 0.13424  |
| H | -5.63044 | -2.99270 | 0.37144  |
| H | -6.47125 | 1.19589  | -0.11225 |
| H | -7.27685 | -1.13648 | 0.16448  |
| O | -4.07006 | 1.95631  | -0.21479 |
| C | 3.88820  | -0.05495 | -0.01132 |

|   |          |          |          |
|---|----------|----------|----------|
| C | 4.34870  | -1.16839 | -0.71455 |
| C | 4.80318  | 0.68496  | 0.73879  |
| C | 5.68465  | -1.53911 | -0.66031 |
| H | 3.65946  | -1.73474 | -1.33149 |
| C | 6.13929  | 0.31681  | 0.79056  |
| H | 4.46182  | 1.54443  | 1.30541  |
| C | 6.58466  | -0.79787 | 0.09261  |
| H | 6.02529  | -2.40388 | -1.21880 |
| H | 6.83425  | 0.89948  | 1.38493  |
| H | 7.62929  | -1.08505 | 0.13251  |
| H | -3.09171 | 2.03846  | -0.23141 |

|    |          |          |          |
|----|----------|----------|----------|
| 36 |          |          |          |
| 18 |          |          |          |
| C  | 0.65407  | 1.05443  | 0.04337  |
| C  | 0.81497  | 3.46777  | 0.06609  |
| C  | 2.16610  | 3.37619  | 0.07249  |
| C  | 2.79573  | 2.10621  | 0.06882  |
| C  | 2.07311  | 0.94210  | 0.05375  |
| C  | -1.49273 | 0.77767  | 0.00217  |
| C  | -1.28873 | 2.13749  | 0.02438  |
| H  | 0.26257  | 4.39716  | 0.07342  |
| H  | 2.75864  | 4.28129  | 0.09068  |
| H  | 3.87728  | 2.05636  | 0.10155  |
| H  | -1.96273 | 2.97661  | 0.01413  |
| N  | 0.07479  | 2.31656  | 0.05122  |
| N  | -0.28797 | 0.12684  | 0.01342  |
| C  | -2.75541 | 0.03478  | -0.03274 |
| C  | -3.98002 | 0.70855  | 0.02668  |
| C  | -2.77237 | -1.36947 | -0.13011 |
| C  | -5.18562 | 0.03713  | -0.01079 |
| H  | -3.98191 | 1.79032  | 0.10828  |
| C  | -3.99318 | -2.04538 | -0.16779 |
| C  | -5.18529 | -1.35293 | -0.10956 |
| H  | -6.11830 | 0.58655  | 0.03802  |
| H  | -3.96818 | -3.12597 | -0.24423 |
| H  | -6.12313 | -1.89684 | -0.13977 |
| O  | -1.65752 | -2.11999 | -0.19070 |
| C  | 2.72880  | -0.38530 | 0.04214  |
| C  | 3.84342  | -0.60544 | -0.76799 |
| C  | 2.27115  | -1.42759 | 0.84952  |
| C  | 4.49099  | -1.83202 | -0.76555 |
| H  | 4.19240  | 0.18430  | -1.42418 |
| C  | 2.92170  | -2.65196 | 0.85427  |

|   |          |          |          |
|---|----------|----------|----------|
| H | 1.40375  | -1.27673 | 1.47911  |
| C | 4.03301  | -2.85902 | 0.04788  |
| H | 5.34988  | -1.98806 | -1.40887 |
| H | 2.55498  | -3.44990 | 1.49012  |
| H | 4.53564  | -3.81976 | 0.04840  |
| H | -0.86670 | -1.53852 | -0.15569 |

|    |          |          |          |
|----|----------|----------|----------|
| 40 |          |          |          |
| 19 |          |          |          |
| C  | -1.08927 | 1.13335  | -0.15434 |
| C  | 0.67801  | -0.50306 | 0.00075  |
| C  | 1.62649  | 0.46515  | -0.12839 |
| C  | 1.19872  | 1.82107  | -0.27166 |
| C  | -0.12161 | 2.15104  | -0.28418 |
| C  | -2.84829 | -0.10905 | 0.01757  |
| C  | -1.77152 | -0.96440 | 0.09328  |
| H  | 0.90812  | -1.55016 | 0.14287  |
| H  | 1.94850  | 2.59310  | -0.39524 |
| H  | -0.46002 | 3.17212  | -0.40194 |
| H  | -1.69532 | -2.03132 | 0.21264  |
| N  | -0.65121 | -0.17426 | -0.01876 |
| N  | -2.41046 | 1.17983  | -0.13487 |
| C  | -4.27825 | -0.42382 | 0.07998  |
| C  | -4.71103 | -1.74605 | 0.22731  |
| C  | -5.25213 | 0.58917  | -0.00527 |
| C  | -6.05061 | -2.07349 | 0.29085  |
| H  | -3.97207 | -2.53749 | 0.29333  |
| C  | -6.60588 | 0.25480  | 0.05946  |
| C  | -7.00206 | -1.05882 | 0.20565  |
| H  | -6.35507 | -3.10712 | 0.40523  |
| H  | -7.32724 | 1.06045  | -0.00924 |
| H  | -8.05888 | -1.29785 | 0.25371  |
| O  | -4.95136 | 1.89233  | -0.14844 |
| C  | 3.06551  | 0.11601  | -0.11737 |
| C  | 3.55100  | -0.98824 | -0.82582 |
| C  | 3.98006  | 0.87582  | 0.60318  |
| C  | 4.88982  | -1.32180 | -0.80357 |
| H  | 2.86975  | -1.58162 | -1.42601 |
| C  | 5.33231  | 0.55490  | 0.63356  |
| H  | 3.63524  | 1.72918  | 1.17707  |
| C  | 5.79287  | -0.55167 | -0.07160 |
| H  | 5.26591  | -2.17186 | -1.36023 |
| H  | 6.00677  | 1.16933  | 1.21477  |
| O  | 7.08748  | -0.95464 | -0.11175 |

|   |          |          |          |
|---|----------|----------|----------|
| C | 8.05029  | -0.20620 | 0.60054  |
| H | 7.83874  | -0.20264 | 1.67369  |
| H | 9.00348  | -0.69885 | 0.42517  |
| H | 8.10418  | 0.82362  | 0.23585  |
| H | -3.97606 | 2.00246  | -0.18431 |

|    |          |          |          |
|----|----------|----------|----------|
| 42 |          |          |          |
| 20 |          |          |          |
| C  | 1.81114  | 1.17026  | 0.19164  |
| C  | -0.00338 | -0.40948 | 0.00316  |
| C  | -0.92037 | 0.58467  | 0.16175  |
| C  | -0.45464 | 1.92356  | 0.33833  |
| C  | 0.87511  | 2.21232  | 0.35599  |
| C  | 3.53117  | -0.11856 | -0.02875 |
| C  | 2.42964  | -0.93958 | -0.12261 |
| H  | -0.26659 | -1.44498 | -0.16425 |
| H  | -1.18019 | 2.71438  | 0.48452  |
| H  | 1.24470  | 3.21895  | 0.50067  |
| H  | 2.32172  | -1.99993 | -0.27195 |
| N  | 1.33335  | -0.12090 | 0.02025  |
| N  | 3.13163  | 1.17795  | 0.16466  |
| C  | 4.95049  | -0.47292 | -0.10955 |
| C  | 5.34223  | -1.80211 | -0.30393 |
| C  | 5.95479  | 0.50690  | 0.00475  |
| C  | 6.67072  | -2.16731 | -0.38509 |
| H  | 4.57956  | -2.56830 | -0.39349 |
| C  | 7.29753  | 0.13406  | -0.07780 |
| C  | 7.65282  | -1.18508 | -0.27019 |
| H  | 6.94338  | -3.20505 | -0.53609 |
| H  | 8.04329  | 0.91470  | 0.01441  |
| H  | 8.70165  | -1.45417 | -0.33152 |
| O  | 5.69527  | 1.81313  | 0.19314  |
| C  | -2.36875 | 0.27691  | 0.14241  |
| C  | -2.87579 | -0.83907 | 0.81110  |
| C  | -3.25798 | 1.10009  | -0.55064 |
| C  | -4.22811 | -1.13020 | 0.77747  |
| H  | -2.20757 | -1.47029 | 1.38600  |
| C  | -4.61230 | 0.81420  | -0.58334 |
| H  | -2.88264 | 1.96198  | -1.09064 |
| C  | -5.10559 | -0.30586 | 0.08014  |
| H  | -4.62403 | -1.99211 | 1.30037  |
| H  | -5.29117 | 1.45480  | -1.13082 |
| C  | -6.54941 | -0.66147 | 0.07837  |
| O  | -7.01305 | -1.62196 | 0.63812  |

|   |          |          |          |
|---|----------|----------|----------|
| O | -7.29455 | 0.20736  | -0.62024 |
| C | -8.69567 | -0.07153 | -0.66767 |
| H | -9.13252 | 0.72307  | -1.26612 |
| H | -8.87486 | -1.04176 | -1.12930 |
| H | -9.11762 | -0.07128 | 0.33656  |
| H | 4.72475  | 1.95360  | 0.23586  |

|    |          |          |          |
|----|----------|----------|----------|
| 40 |          |          |          |
| 21 |          |          |          |
| C  | -0.29160 | 1.44992  | 0.04634  |
| C  | -0.84352 | 3.80482  | 0.00760  |
| C  | 0.47519  | 4.11156  | 0.03283  |
| C  | 1.44815  | 3.08155  | 0.07330  |
| C  | 1.09895  | 1.75594  | 0.07848  |
| C  | -2.26288 | 0.55637  | -0.01502 |
| C  | -2.46518 | 1.91653  | -0.02460 |
| H  | -1.64346 | 4.53171  | -0.01683 |
| H  | 0.77746  | 5.15051  | 0.03420  |
| H  | 2.49584  | 3.35170  | 0.12514  |
| H  | -3.35444 | 2.52156  | -0.06576 |
| N  | -1.21420 | 2.48687  | 0.01523  |
| N  | -0.92114 | 0.28658  | 0.02787  |
| C  | -3.25317 | -0.52343 | -0.04854 |
| C  | -4.62179 | -0.23631 | -0.01124 |
| C  | -2.85798 | -1.87243 | -0.12338 |
| C  | -5.57818 | -1.23118 | -0.04974 |
| H  | -4.94051 | 0.79862  | 0.05393  |
| C  | -3.82746 | -2.87605 | -0.16214 |
| C  | -5.17058 | -2.56156 | -0.12649 |
| H  | -6.63125 | -0.97774 | -0.01819 |
| H  | -3.48680 | -3.90302 | -0.22079 |
| H  | -5.90816 | -3.35614 | -0.15685 |
| O  | -1.57177 | -2.26470 | -0.16149 |
| C  | 2.11029  | 0.67818  | 0.10614  |
| C  | 3.26320  | 0.77523  | -0.66464 |
| C  | 1.95863  | -0.45210 | 0.91851  |
| C  | 4.24775  | -0.20579 | -0.63326 |
| H  | 3.39426  | 1.62342  | -1.32767 |
| C  | 2.92948  | -1.42974 | 0.96432  |
| H  | 1.06892  | -0.56090 | 1.52509  |
| C  | 4.08287  | -1.31515 | 0.18802  |
| H  | 5.12306  | -0.09524 | -1.25922 |
| H  | 2.81475  | -2.30232 | 1.59609  |
| O  | 4.97625  | -2.33032 | 0.29707  |



|   |          |          |          |
|---|----------|----------|----------|
| C | 6.15533  | -2.27788 | -0.47700 |
| H | 6.71309  | -3.17977 | -0.23668 |
| H | 5.92967  | -2.26839 | -1.54731 |
| H | 6.76027  | -1.40202 | -0.22443 |
| H | -0.98611 | -1.47698 | -0.12408 |

42

22

|   |          |          |          |
|---|----------|----------|----------|
| C | -1.06596 | 1.55370  | 0.04851  |
| C | -2.00557 | 3.78242  | 0.04880  |
| C | -0.75763 | 4.30844  | 0.07310  |
| C | 0.37503  | 3.45687  | 0.08884  |
| C | 0.25105  | 2.09219  | 0.07797  |
| C | -2.85875 | 0.34252  | -0.01885 |
| C | -3.28726 | 1.64929  | -0.00782 |
| H | -2.91637 | 4.36502  | 0.04043  |
| H | -0.63532 | 5.38323  | 0.09021  |
| H | 1.36305  | 3.89832  | 0.13553  |
| H | -4.26605 | 2.09598  | -0.03724 |
| N | -2.15024 | 2.42195  | 0.03552  |
| N | -1.48990 | 0.30219  | 0.01526  |
| C | -3.65410 | -0.88710 | -0.06482 |
| C | -5.05119 | -0.83322 | -0.01036 |
| C | -3.04009 | -2.14936 | -0.16973 |
| C | -5.82815 | -1.97290 | -0.06125 |
| H | -5.53767 | 0.13230  | 0.07899  |
| C | -3.82877 | -3.30002 | -0.22112 |
| C | -5.20483 | -3.21485 | -0.16839 |
| H | -6.90827 | -1.89986 | -0.01566 |
| H | -3.32212 | -4.25430 | -0.30287 |
| H | -5.79970 | -4.12078 | -0.20871 |
| O | -1.70711 | -2.32128 | -0.22591 |
| C | 1.43389  | 1.20261  | 0.09434  |
| C | 2.54519  | 1.50685  | -0.69369 |
| C | 1.47844  | 0.06876  | 0.90802  |
| C | 3.67696  | 0.70991  | -0.66436 |
| H | 2.51417  | 2.36518  | -1.35514 |
| C | 2.61059  | -0.72533 | 0.94376  |
| H | 0.62337  | -0.18786 | 1.51936  |
| C | 3.71677  | -0.41088 | 0.15961  |
| H | 4.52950  | 0.95015  | -1.28591 |
| H | 2.65148  | -1.60105 | 1.57955  |
| C | 4.90651  | -1.29919 | 0.23518  |
| O | 4.99138  | -2.26554 | 0.94873  |

|   |          |          |          |
|---|----------|----------|----------|
| O | 5.89582  | -0.90944 | -0.58439 |
| C | 7.07185  | -1.72029 | -0.56687 |
| H | 6.83441  | -2.74177 | -0.86163 |
| H | 7.75269  | -1.26516 | -1.28099 |
| H | 7.51251  | -1.73099 | 0.42938  |
| H | -1.25930 | -1.44968 | -0.17358 |

29

23

|    |          |          |          |
|----|----------|----------|----------|
| C  | 1.41461  | 0.94381  | 0.00001  |
| C  | 2.78360  | -1.04704 | 0.00011  |
| C  | 3.89459  | -0.27086 | 0.00011  |
| C  | 3.80268  | 1.14490  | 0.00006  |
| C  | 2.57804  | 1.74074  | 0.00001  |
| C  | -0.57372 | 0.09911  | -0.00002 |
| C  | 0.29253  | -0.97327 | 0.00004  |
| H  | 2.80192  | -2.12728 | 0.00014  |
| H  | 4.71054  | 1.73364  | 0.00007  |
| H  | 2.46587  | 2.81679  | -0.00003 |
| H  | 0.13408  | -2.03769 | 0.00007  |
| N  | 1.55796  | -0.43780 | 0.00006  |
| N  | 0.13502  | 1.27050  | -0.00003 |
| C  | -2.03831 | 0.09504  | -0.00006 |
| C  | -2.74475 | -1.11564 | -0.00006 |
| C  | -2.76955 | 1.29349  | -0.00011 |
| C  | -4.12461 | -1.17870 | -0.00010 |
| H  | -2.18409 | -2.04533 | -0.00003 |
| C  | -4.16468 | 1.24108  | -0.00016 |
| C  | -4.82561 | 0.03243  | -0.00016 |
| H  | -4.70526 | 2.18025  | -0.00022 |
| H  | -5.91155 | 0.02198  | -0.00022 |
| O  | -2.20253 | 2.51485  | -0.00012 |
| Cl | 5.46146  | -1.02686 | 0.00018  |
| C  | -4.85771 | -2.49336 | -0.00000 |
| H  | -4.16515 | -3.33682 | -0.00086 |
| H  | -5.49822 | -2.59549 | 0.88000  |
| H  | -5.49963 | -2.59484 | -0.87905 |
| H  | -1.22664 | 2.42345  | -0.00009 |

32

24

|   |          |          |          |
|---|----------|----------|----------|
| C | -0.74480 | -1.10391 | 0.00004  |
| C | -2.20381 | 0.81854  | -0.00009 |
| C | -3.28266 | -0.00360 | -0.00007 |

|   |          |          |          |
|---|----------|----------|----------|
| C | -3.11764 | -1.41771 | 0.00001  |
| C | -1.86985 | -1.95752 | 0.00006  |
| C | 1.20034  | -0.16081 | 0.00003  |
| C | 0.28610  | 0.86779  | -0.00006 |
| H | -2.26891 | 1.89699  | -0.00015 |
| H | -3.99293 | -2.05519 | 0.00001  |
| H | -1.70464 | -3.02660 | 0.00012  |
| H | 0.39348  | 1.93857  | -0.00013 |
| N | -0.95484 | 0.27242  | -0.00004 |
| N | 0.54530  | -1.36722 | 0.00008  |
| C | 2.66261  | -0.08978 | 0.00004  |
| C | 3.31114  | 1.15337  | 0.00003  |
| C | 3.44941  | -1.25250 | 0.00005  |
| C | 4.68608  | 1.28151  | 0.00003  |
| H | 2.70738  | 2.05563  | 0.00004  |
| C | 4.84064  | -1.13396 | 0.00005  |
| C | 5.44341  | 0.10440  | 0.00005  |
| H | 5.42500  | -2.04648 | 0.00008  |
| H | 6.52760  | 0.16613  | 0.00006  |
| O | 2.94259  | -2.49998 | 0.00009  |
| C | -4.66228 | 0.57137  | -0.00006 |
| F | -5.36442 | 0.17550  | -1.07785 |
| F | -4.65679 | 1.91434  | -0.00054 |
| F | -5.36408 | 0.17629  | 1.07825  |
| C | 5.35670  | 2.62901  | -0.00005 |
| H | 4.62554  | 3.43917  | 0.00067  |
| H | 5.99305  | 2.76020  | 0.87906  |
| H | 5.99184  | 2.76069  | -0.87997 |
| H | 1.96402  | -2.45802 | 0.00014  |

46

25

|   |          |          |          |
|---|----------|----------|----------|
| C | 0.24166  | 0.04452  | 0.02300  |
| C | -1.46386 | -1.67029 | -0.01402 |
| C | -2.44335 | -0.72732 | 0.01234  |
| C | -2.06629 | 0.64658  | 0.04450  |
| C | -0.75968 | 1.05464  | 0.05204  |
| C | 2.04189  | -1.15471 | -0.04201 |
| C | 0.99384  | -2.04557 | -0.05002 |
| H | -1.65147 | -2.73393 | -0.06408 |
| H | -2.84873 | 1.39268  | 0.11150  |
| H | 0.94986  | -3.12023 | -0.09077 |
| N | -0.15134 | -1.28483 | -0.00547 |
| N | 1.56156  | 0.12689  | 0.00217  |

|   |          |          |          |
|---|----------|----------|----------|
| C | 3.48180  | -1.42419 | -0.07689 |
| C | 3.96142  | -2.73816 | -0.05200 |
| C | 4.41830  | -0.37498 | -0.13936 |
| C | 5.31152  | -3.02372 | -0.09050 |
| H | 3.25129  | -3.55648 | 0.00238  |
| C | 5.78273  | -0.66711 | -0.17832 |
| C | 6.22560  | -1.97380 | -0.15457 |
| H | 5.65294  | -4.05189 | -0.06906 |
| H | 6.47463  | 0.16534  | -0.22763 |
| H | 7.29002  | -2.17966 | -0.18500 |
| O | 4.07157  | 0.92470  | -0.16521 |
| C | -0.39054 | 2.48805  | 0.09217  |
| C | -1.08810 | 3.41081  | -0.68824 |
| C | 0.63424  | 2.94979  | 0.91936  |
| C | -0.77783 | 4.76166  | -0.63725 |
| H | -1.86617 | 3.06417  | -1.35944 |
| C | 0.94090  | 4.30089  | 0.97280  |
| H | 1.19099  | 2.24737  | 1.52606  |
| C | 0.23705  | 5.21135  | 0.19582  |
| H | -1.32451 | 5.46303  | -1.25782 |
| H | 1.73766  | 4.64299  | 1.62366  |
| H | 0.48361  | 6.26652  | 0.23441  |
| C | -3.87120 | -1.12509 | 0.01284  |
| C | -4.32515 | -2.17071 | 0.81714  |
| C | -4.79191 | -0.45993 | -0.79769 |
| C | -5.66006 | -2.54879 | 0.80311  |
| H | -3.63140 | -2.67620 | 1.48013  |
| C | -6.12701 | -0.83503 | -0.80962 |
| H | -4.45567 | 0.34548  | -1.44149 |
| C | -6.56576 | -1.88232 | -0.01044 |
| H | -5.99545 | -3.35970 | 1.44010  |
| H | -6.82654 | -0.31108 | -1.45143 |
| H | -7.60964 | -2.17487 | -0.01904 |
| H | 3.09317  | 1.00513  | -0.13292 |

52

26

|   |          |         |          |
|---|----------|---------|----------|
| C | 0.48884  | 3.11874 | -0.15642 |
| C | 2.84132  | 2.85572 | 0.29590  |
| C | 3.00736  | 4.20018 | 0.23953  |
| C | 1.89861  | 5.04832 | -0.02503 |
| C | 0.65888  | 4.51825 | -0.21940 |
| C | -0.19261 | 1.06853 | -0.13778 |
| C | 1.16402  | 1.00321 | 0.12658  |

|   |          |          |          |
|---|----------|----------|----------|
| H | 3.64452  | 2.16001  | 0.49062  |
| H | 3.99410  | 4.61555  | 0.39608  |
| H | 2.04645  | 6.12036  | -0.07133 |
| H | -0.20982 | 5.13100  | -0.42178 |
| N | 1.59542  | 2.31945  | 0.09778  |
| N | -0.58827 | 2.37257  | -0.29777 |
| C | -1.18534 | -0.01248 | -0.22199 |
| C | -0.81491 | -1.32771 | -0.52217 |
| C | -2.54923 | 0.25487  | -0.00009 |
| C | -1.74451 | -2.34677 | -0.54900 |
| H | 0.21614  | -1.54687 | -0.76613 |
| C | -3.50345 | -0.77580 | -0.00624 |
| C | -3.08064 | -2.06623 | -0.27699 |
| H | -1.43844 | -3.35835 | -0.78969 |
| H | -3.80199 | -2.87438 | -0.29599 |
| O | -3.01716 | 1.49661  | 0.23951  |
| C | 2.10079  | -0.10812 | 0.45717  |
| H | 2.76800  | 0.20500  | 1.26803  |
| H | 1.53043  | -0.94288 | 0.86569  |
| C | 2.95452  | -0.59738 | -0.73076 |
| H | 2.29141  | -0.95894 | -1.52095 |
| H | 3.50075  | 0.24558  | -1.16321 |
| C | 3.92417  | -1.67923 | -0.33005 |
| C | 5.25082  | -1.37886 | -0.03241 |
| C | 3.50360  | -3.00277 | -0.21256 |
| C | 6.13509  | -2.36994 | 0.37340  |
| H | 5.60245  | -0.35569 | -0.12935 |
| C | 4.38219  | -3.99737 | 0.19236  |
| H | 2.47519  | -3.26090 | -0.44755 |
| C | 5.70233  | -3.68333 | 0.48830  |
| H | 7.16574  | -2.11552 | 0.59549  |
| H | 4.03611  | -5.02198 | 0.27327  |
| H | 6.39092  | -4.45979 | 0.80217  |
| C | -4.93924 | -0.40172 | 0.26759  |
| H | -4.98260 | 0.13110  | 1.22333  |
| H | -5.25556 | 0.34044  | -0.47184 |
| C | -5.93773 | -1.55866 | 0.28359  |
| H | -5.95071 | -2.06883 | -0.68419 |
| H | -5.62335 | -2.30078 | 1.02721  |
| C | -7.32252 | -1.09437 | 0.61993  |
| H | -7.43393 | -0.59145 | 1.57980  |
| C | -8.38924 | -1.24161 | -0.15267 |
| H | -9.36596 | -0.87942 | 0.14839  |
| H | -8.32882 | -1.73148 | -1.12030 |

|    |          |          |          |
|----|----------|----------|----------|
| H  | -2.30254 | 2.14830  | 0.07133  |
| 26 |          |          |          |
| 27 |          |          |          |
| C  | 2.78803  | 0.66884  | -0.00005 |
| C  | 4.10110  | -1.35611 | 0.00003  |
| C  | 5.23949  | -0.62221 | 0.00004  |
| C  | 5.17549  | 0.79861  | -0.00000 |
| C  | 3.97280  | 1.43711  | -0.00005 |
| C  | 0.77922  | -0.12393 | -0.00001 |
| C  | 1.61071  | -1.21982 | -0.00005 |
| H  | 4.07174  | -2.43706 | 0.00006  |
| H  | 6.19447  | -1.13045 | 0.00007  |
| H  | 6.09444  | 1.37189  | -0.00001 |
| H  | 3.88782  | 2.51577  | -0.00009 |
| H  | 1.41729  | -2.27673 | -0.00005 |
| N  | 2.88990  | -0.71428 | -0.00001 |
| N  | 1.51775  | 1.03123  | -0.00010 |
| C  | -0.68360 | -0.05024 | 0.00002  |
| C  | -1.47232 | -1.19847 | 0.00001  |
| C  | -1.34268 | 1.19771  | 0.00003  |
| C  | -2.84802 | -1.16163 | 0.00001  |
| C  | -2.73741 | 1.22883  | 0.00001  |
| C  | -3.48310 | 0.06987  | 0.00000  |
| O  | -0.71402 | 2.37342  | 0.00006  |
| F  | -0.88674 | -2.40757 | 0.00001  |
| F  | -3.56326 | -2.28888 | -0.00000 |
| F  | -4.81119 | 0.12847  | -0.00000 |
| F  | -3.36843 | 2.40368  | 0.00002  |
| H  | 0.26139  | 2.21783  | 0.00012  |

|    |         |          |          |
|----|---------|----------|----------|
| 26 |         |          |          |
| 28 |         |          |          |
| C  | 3.93073 | -1.34337 | -0.34714 |
| C  | 4.48073 | -0.10190 | -0.02275 |
| C  | 3.67283 | 0.98375  | 0.25096  |
| C  | 2.28445 | 0.85497  | 0.20758  |
| C  | 1.71271 | -0.39298 | -0.11700 |
| C  | 2.55907 | -1.47508 | -0.39130 |
| H  | 4.57198 | -2.18968 | -0.56113 |
| H  | 5.55824 | 0.01584  | 0.01543  |
| H  | 4.08885 | 1.95179  | 0.50286  |
| H  | 2.11359 | -2.43297 | -0.64239 |
| C  | 0.27430 | -0.57801 | -0.17397 |

|   |          |          |          |
|---|----------|----------|----------|
| H | -0.07899 | -1.58143 | -0.43744 |
| C | -1.94198 | 0.12108  | 0.02943  |
| C | -2.77213 | 1.07169  | -0.56234 |
| C | -2.50752 | -1.01187 | 0.61343  |
| C | -4.14209 | 0.87061  | -0.60615 |
| H | -2.32563 | 1.95994  | -0.99422 |
| C | -3.88185 | -1.20224 | 0.57598  |
| H | -1.87397 | -1.72668 | 1.12666  |
| C | -4.70309 | -0.26754 | -0.03861 |
| H | -4.77747 | 1.61064  | -1.07988 |
| H | -4.31282 | -2.08201 | 1.04107  |
| H | -5.77635 | -0.41760 | -0.06404 |
| O | 1.53894  | 1.93193  | 0.47702  |
| H | 0.58698  | 1.68658  | 0.40304  |
| N | -0.55469 | 0.36793  | 0.05218  |

|    |          |          |          |
|----|----------|----------|----------|
| 25 |          |          |          |
| 29 |          |          |          |
| C  | 1.94585  | -0.74551 | -0.00009 |
| C  | 1.90315  | 0.64324  | -0.00011 |
| C  | 3.08343  | 1.37557  | 0.00005  |
| C  | 4.27245  | 0.66231  | 0.00025  |
| C  | 4.28907  | -0.73747 | 0.00027  |
| C  | 3.11400  | -1.47792 | 0.00009  |
| C  | -0.10941 | -0.07531 | -0.00022 |
| H  | 3.06861  | 2.45853  | 0.00000  |
| H  | 5.21393  | 1.19914  | 0.00037  |
| H  | 5.24061  | -1.25601 | 0.00041  |
| H  | 3.11338  | -2.56054 | 0.00008  |
| C  | -1.55090 | -0.20402 | -0.00004 |
| C  | -2.34951 | 0.95598  | 0.00003  |
| C  | -2.16377 | -1.46330 | 0.00001  |
| C  | -3.73843 | 0.82461  | 0.00014  |
| C  | -3.53684 | -1.58102 | 0.00012  |
| H  | -1.53749 | -2.34698 | -0.00006 |
| C  | -4.32094 | -0.42605 | 0.00019  |
| H  | -4.33425 | 1.72921  | 0.00020  |
| H  | -4.00076 | -2.55975 | 0.00014  |
| H  | -5.40230 | -0.50827 | 0.00028  |
| N  | 0.56730  | 1.03099  | -0.00042 |
| O  | 0.65367  | -1.20068 | -0.00038 |
| O  | -1.84122 | 2.19571  | 0.00004  |
| H  | -0.86128 | 2.16091  | 0.00016  |

|    |          |          |          |
|----|----------|----------|----------|
| 25 |          |          |          |
| 30 |          |          |          |
| C  | 2.14938  | -0.73899 | -0.00002 |
| C  | 1.83317  | 0.62595  | 0.00004  |
| C  | 2.85505  | 1.57497  | 0.00007  |
| C  | 4.16634  | 1.14116  | 0.00005  |
| C  | 4.47183  | -0.22433 | -0.00001 |
| C  | 3.46895  | -1.17734 | -0.00005 |
| C  | -0.24633 | -0.17420 | 0.00000  |
| H  | 2.60732  | 2.62969  | 0.00011  |
| H  | 4.97092  | 1.86734  | 0.00007  |
| H  | 5.50821  | -0.54161 | -0.00002 |
| H  | 3.70829  | -2.23414 | -0.00009 |
| C  | -1.70396 | -0.15875 | 0.00001  |
| C  | -2.39795 | 1.06992  | -0.00007 |
| C  | -2.44575 | -1.34789 | 0.00006  |
| C  | -3.79430 | 1.06999  | -0.00003 |
| C  | -3.82324 | -1.33926 | 0.00006  |
| H  | -1.92395 | -2.29893 | 0.00009  |
| C  | -4.49599 | -0.11643 | 0.00003  |
| H  | -4.29847 | 2.02878  | -0.00006 |
| H  | -4.37475 | -2.27143 | 0.00010  |
| H  | -5.58021 | -0.09534 | 0.00004  |
| N  | 0.47912  | 0.90134  | 0.00002  |
| O  | -1.78304 | 2.25873  | -0.00007 |
| H  | -0.80942 | 2.12400  | -0.00003 |
| S  | 0.67996  | -1.67602 | -0.00005 |

|    |          |          |          |
|----|----------|----------|----------|
| 24 |          |          |          |
| 31 |          |          |          |
| C  | 0.78833  | -0.18988 | -0.00000 |
| C  | -0.65658 | -0.11586 | -0.00000 |
| C  | -1.48579 | -1.27055 | -0.00000 |
| C  | 1.55845  | 0.99467  | 0.00000  |
| C  | -1.27223 | 1.15976  | -0.00000 |
| C  | -0.44879 | 2.33754  | -0.00000 |
| C  | 0.89713  | 2.26572  | -0.00000 |
| C  | -2.66912 | 1.26991  | -0.00000 |
| C  | -3.44764 | 0.13296  | 0.00000  |
| C  | -2.86301 | -1.12955 | 0.00000  |
| H  | -3.46496 | -2.03020 | 0.00000  |
| H  | -4.52893 | 0.21695  | 0.00001  |
| H  | -0.00257 | -2.45777 | 0.00001  |
| C  | 2.69645  | -1.49243 | -0.00000 |



|   |          |          |          |
|---|----------|----------|----------|
| C | 3.53369  | -0.37613 | 0.00000  |
| C | 2.95333  | 0.87049  | 0.00001  |
| H | 3.11135  | -2.49569 | -0.00001 |
| H | 4.60930  | -0.50152 | 0.00000  |
| H | -3.12509 | 2.25349  | -0.00000 |
| H | -0.94441 | 3.30259  | -0.00000 |
| H | 1.50203  | 3.16641  | 0.00000  |
| H | 3.56606  | 1.76640  | 0.00001  |
| N | 1.38077  | -1.40547 | -0.00000 |
| O | -0.98669 | -2.51528 | 0.00000  |

29

32

|   |          |          |          |
|---|----------|----------|----------|
| C | 4.45146  | -1.46711 | -0.08592 |
| C | 3.36382  | -1.75781 | -0.89779 |
| C | 2.22699  | -0.96294 | -0.84938 |
| C | 2.17957  | 0.14102  | -0.00034 |
| C | 3.28712  | 0.44488  | 0.78956  |
| C | 4.41086  | -0.36485 | 0.75947  |
| C | 1.01624  | 1.07918  | 0.02926  |
| C | -0.36133 | 0.58204  | 0.03645  |
| C | -0.68204 | -0.75389 | 0.30820  |
| C | -1.98042 | -1.21604 | 0.31747  |
| H | -2.17797 | -2.25385 | 0.54484  |
| C | -3.01857 | -0.31659 | 0.03751  |
| C | -2.74267 | 1.01878  | -0.21239 |
| C | -1.43638 | 1.48234  | -0.19279 |
| H | 5.33537  | -2.09442 | -0.11808 |
| H | 3.40063  | -2.60406 | -1.57455 |
| H | 3.25579  | 1.32352  | 1.42257  |
| H | 5.26222  | -0.13046 | 1.38848  |
| H | -3.55101 | 1.71248  | -0.40390 |
| H | 1.38700  | -1.18570 | -1.49666 |
| H | 0.11479  | -1.44772 | 0.54190  |
| O | 1.25282  | 2.28831  | 0.04599  |
| O | -1.24310 | 2.78676  | -0.40453 |
| H | -0.29087 | 2.98274  | -0.27233 |
| O | -4.32269 | -0.66192 | 0.00530  |
| C | -4.68589 | -2.00463 | 0.26310  |
| H | -5.76893 | -2.04088 | 0.17745  |
| H | -4.24263 | -2.68396 | -0.46958 |
| H | -4.39325 | -2.30918 | 1.27127  |

36

| 33 |          |          |          |
|----|----------|----------|----------|
| C  | -4.50598 | -2.34689 | -0.00995 |
| C  | -3.13422 | -2.22166 | -0.00083 |
| C  | -2.57340 | -0.94431 | -0.00035 |
| C  | -3.37689 | 0.19098  | -0.00882 |
| C  | -4.76975 | 0.04110  | -0.01796 |
| C  | -5.33157 | -1.21434 | -0.01856 |
| H  | -4.94962 | -3.33615 | -0.01037 |
| H  | -2.48128 | -3.08584 | 0.00598  |
| C  | -2.73423 | 1.49612  | -0.00768 |
| H  | -5.37684 | 0.93833  | -0.02440 |
| H  | -6.40873 | -1.33114 | -0.02562 |
| C  | -1.28437 | 1.48439  | 0.00237  |
| C  | -0.56572 | 0.33151  | 0.01038  |
| O  | -1.22341 | -0.86616 | 0.00873  |
| O  | -3.32594 | 2.57521  | -0.01424 |
| O  | -0.71603 | 2.71227  | 0.00347  |
| H  | -1.46377 | 3.33834  | -0.00243 |
| C  | 0.88530  | 0.16753  | 0.02209  |
| C  | 1.45035  | -1.11316 | 0.03159  |
| C  | 1.76757  | 1.25499  | 0.01879  |
| C  | 2.81570  | -1.30603 | 0.04213  |
| H  | 0.80436  | -1.98078 | 0.02744  |
| C  | 3.13569  | 1.07126  | 0.02925  |
| H  | 1.37775  | 2.26142  | 0.00469  |
| C  | 3.70478  | -0.21471 | 0.05059  |
| H  | 3.19138  | -2.31985 | 0.04338  |
| H  | 3.76700  | 1.94887  | 0.02002  |
| N  | 5.06788  | -0.39852 | 0.08148  |
| C  | 5.61539  | -1.72999 | -0.06466 |
| H  | 5.34896  | -2.18998 | -1.02449 |
| H  | 6.70028  | -1.68060 | -0.00416 |
| H  | 5.27374  | -2.39118 | 0.73575  |
| C  | 5.94788  | 0.74004  | -0.07381 |
| H  | 5.79135  | 1.47472  | 0.71988  |
| H  | 6.98113  | 0.40640  | -0.00905 |
| H  | 5.81295  | 1.24554  | -1.03810 |

| 31 |          |          |          |
|----|----------|----------|----------|
| 34 |          |          |          |
| C  | -4.59952 | -1.00464 | 0.00040  |
| C  | -3.93961 | 0.21229  | 0.00060  |
| C  | -2.54896 | 0.24800  | 0.00030  |
| C  | -1.81844 | -0.93969 | -0.00017 |

|   |          |          |          |
|---|----------|----------|----------|
| C | -2.48828 | -2.16058 | -0.00039 |
| C | -3.87241 | -2.19165 | -0.00009 |
| C | -1.85208 | 1.55737  | 0.00058  |
| C | -0.32943 | -0.94113 | -0.00041 |
| C | 0.38516  | 0.35342  | -0.00034 |
| C | -0.35842 | 1.55228  | -0.00017 |
| C | 0.27083  | 2.78288  | -0.00038 |
| H | -0.33649 | 3.67833  | -0.00011 |
| C | 1.65680  | 2.84076  | -0.00082 |
| C | 2.41705  | 1.68929  | -0.00098 |
| C | 1.80170  | 0.42955  | -0.00076 |
| H | -5.68324 | -1.03252 | 0.00064  |
| H | -4.48182 | 1.14966  | 0.00101  |
| H | -1.90635 | -3.07322 | -0.00076 |
| H | -4.39013 | -3.14413 | -0.00025 |
| H | 2.15794  | 3.80219  | -0.00110 |
| H | 3.49406  | 1.73898  | -0.00125 |
| O | -2.47475 | 2.59775  | 0.00124  |
| O | 0.25464  | -2.01900 | -0.00129 |
| N | 2.55104  | -0.74253 | -0.00100 |
| C | 3.92123  | -0.89944 | 0.00047  |
| H | 1.98618  | -1.58597 | -0.00131 |
| O | 4.71911  | 0.01251  | 0.00150  |
| C | 4.34620  | -2.35023 | 0.00115  |
| H | 3.96595  | -2.86804 | 0.88442  |
| H | 3.96171  | -2.87065 | -0.87872 |
| H | 5.43196  | -2.39788 | -0.00123 |

19

35

|   |          |          |          |
|---|----------|----------|----------|
| C | 2.48293  | 0.87732  | 0.00025  |
| C | 1.09157  | 0.96743  | 0.00013  |
| C | 0.35122  | -0.22320 | -0.00018 |
| C | 0.99551  | -1.45699 | -0.00036 |
| C | 2.37472  | -1.52423 | -0.00022 |
| C | 3.11882  | -0.34772 | 0.00009  |
| H | 3.04008  | 1.80639  | 0.00049  |
| H | 0.39202  | -2.35440 | -0.00060 |
| H | 2.86661  | -2.48919 | -0.00039 |
| H | 4.20215  | -0.38767 | 0.00021  |
| C | -3.04235 | 0.54195  | -0.00018 |
| H | -3.89343 | -1.54010 | 0.00101  |
| H | -3.84580 | 1.26023  | -0.00035 |
| N | -1.77490 | 0.93010  | -0.00091 |

|   |          |          |          |
|---|----------|----------|----------|
| N | -1.07592 | -0.19961 | -0.00024 |
| N | -1.81219 | -1.29428 | 0.00071  |
| C | -3.06290 | -0.85330 | 0.00044  |
| O | 0.55512  | 2.20247  | 0.00039  |
| H | -0.41867 | 2.14403  | -0.00016 |

21

36

|   |          |          |          |
|---|----------|----------|----------|
| C | -3.69937 | 0.18794  | -0.00004 |
| C | -2.70226 | 1.14129  | 0.00012  |
| C | -1.36961 | 0.72750  | 0.00009  |
| C | -1.04607 | -0.63478 | -0.00007 |
| C | -2.07635 | -1.58380 | -0.00024 |
| C | -3.39169 | -1.17778 | -0.00022 |
| H | -0.49000 | 2.61164  | 0.00032  |
| H | -4.73594 | 0.50502  | -0.00003 |
| H | -2.94454 | 2.19880  | 0.00026  |
| H | -1.79702 | -2.63032 | -0.00036 |
| H | -4.18912 | -1.91082 | -0.00035 |
| C | 1.23037  | -0.21476 | 0.00003  |
| C | 1.00749  | 1.25873  | 0.00015  |
| N | 0.26308  | -1.05585 | -0.00006 |
| N | -0.31527 | 1.61486  | 0.00024  |
| O | 1.87885  | 2.11584  | 0.00014  |
| C | 2.63647  | -0.81933 | 0.00006  |
| O | 2.78616  | -2.01969 | 0.00082  |
| N | 3.65564  | 0.06731  | -0.00088 |
| H | 4.59245  | -0.30142 | -0.00068 |
| H | 3.48596  | 1.06360  | -0.00108 |

19

37

|   |          |         |         |
|---|----------|---------|---------|
| C | 0.24049  | 3.99939 | 3.47528 |
| C | -1.14680 | 4.04534 | 3.56392 |
| C | -1.83683 | 2.95496 | 4.05927 |
| C | -1.09760 | 1.83758 | 4.45484 |
| C | 0.28849  | 1.78601 | 4.36841 |
| C | 0.98181  | 2.88368 | 3.86982 |
| C | 0.77499  | 5.23658 | 2.93227 |
| C | -0.39799 | 6.16192 | 2.64822 |
| C | -1.66153 | 5.37768 | 3.06322 |
| H | -2.91771 | 2.95561 | 4.14250 |
| H | -1.62233 | 0.97225 | 4.84590 |
| H | 0.83912  | 0.90747 | 4.68184 |

|   |          |         |         |
|---|----------|---------|---------|
| H | -0.38944 | 6.43398 | 1.59077 |
| H | -0.26445 | 7.08896 | 3.20953 |
| O | 1.95584  | 5.47375 | 2.74447 |
| O | 2.31909  | 2.86761 | 3.77275 |
| H | 2.62201  | 3.71850 | 3.40430 |
| H | -2.22387 | 5.89503 | 3.84377 |
| H | -2.34781 | 5.23839 | 2.22488 |

23

38

|   |          |          |          |
|---|----------|----------|----------|
| C | -2.20245 | -1.15112 | -0.01705 |
| C | -0.82028 | -1.18347 | -0.01680 |
| C | -0.15785 | -2.41798 | -0.01699 |
| C | -0.92985 | -3.56551 | -0.01742 |
| C | -2.32989 | -3.52730 | -0.01768 |
| C | -2.98532 | -2.31806 | -0.01749 |
| H | -2.69896 | -0.18680 | -0.01690 |
| H | -0.23522 | -0.27182 | -0.01646 |
| H | -4.06674 | -2.24975 | -0.01768 |
| C | -0.46179 | -4.95737 | -0.01769 |
| C | -1.70121 | -5.78947 | -0.01817 |
| C | -1.84140 | -7.16080 | -0.01859 |
| C | -3.13131 | -7.69045 | -0.01898 |
| C | -4.23546 | -6.84746 | -0.01894 |
| C | -4.08814 | -5.45886 | -0.01852 |
| C | -2.81186 | -4.93236 | -0.01814 |
| H | -0.96746 | -7.80256 | -0.01861 |
| H | -3.27518 | -8.76475 | -0.01931 |
| H | -5.23197 | -7.27531 | -0.01925 |
| H | -4.96289 | -4.81801 | -0.01851 |
| O | 0.70015  | -5.32016 | -0.01768 |
| O | 1.18370  | -2.46511 | -0.01673 |
| H | 1.47215  | -3.39446 | -0.01687 |

29

39

|   |          |          |          |
|---|----------|----------|----------|
| C | -2.30347 | -1.24282 | 0.10804  |
| C | -0.91882 | -1.23273 | 0.13105  |
| C | -0.21936 | -2.44089 | 0.05504  |
| C | -0.95592 | -3.61118 | -0.04152 |
| C | -2.35688 | -3.61595 | -0.06449 |
| C | -3.04869 | -2.42658 | 0.01048  |
| H | -2.82918 | -0.29600 | 0.16798  |
| H | -0.36418 | -0.30542 | 0.20700  |

|   |          |           |          |
|---|----------|-----------|----------|
| H | -4.13152 | -2.39072  | -0.00440 |
| C | -0.43416 | -4.97828  | -0.13255 |
| C | -1.63695 | -5.85345  | -0.21533 |
| C | -1.71964 | -7.20427  | -0.31475 |
| C | -3.00242 | -7.81667  | -0.37975 |
| C | -4.16624 | -6.99890  | -0.33899 |
| C | -4.03693 | -5.58245  | -0.23408 |
| C | -2.79917 | -5.02536  | -0.17384 |
| H | -0.82177 | -7.81313  | -0.34459 |
| H | -4.93567 | -4.97482  | -0.20430 |
| O | 0.74288  | -5.29476  | -0.13684 |
| O | 1.12237  | -2.45202  | 0.07588  |
| H | 1.43653  | -3.37185  | 0.01424  |
| C | -4.39232 | -9.79073  | -0.54533 |
| C | -5.54482 | -8.98235  | -0.50506 |
| C | -5.43306 | -7.62093  | -0.40441 |
| C | -3.15029 | -9.21789  | -0.48388 |
| H | -4.49256 | -10.86716 | -0.62508 |
| H | -6.52504 | -9.44319  | -0.55419 |
| H | -6.32292 | -7.00077  | -0.37361 |
| H | -2.25908 | -9.83601  | -0.51450 |

19

40

|   |          |          |          |
|---|----------|----------|----------|
| C | -2.30219 | -1.14923 | 0.11581  |
| C | -0.92958 | -1.27386 | 0.11972  |
| C | -0.33737 | -2.53617 | 0.04195  |
| C | -1.15658 | -3.67802 | -0.04021 |
| C | -2.54932 | -3.52419 | -0.04236 |
| C | -3.12491 | -2.27529 | 0.03459  |
| H | -2.74551 | -0.16121 | 0.17692  |
| H | -0.27931 | -0.40987 | 0.18227  |
| H | -4.20276 | -2.16835 | 0.03205  |
| C | -0.53048 | -5.00348 | -0.12153 |
| O | 0.67561  | -5.18891 | -0.12300 |
| O | 1.00107  | -2.59042 | 0.04996  |
| H | 1.28354  | -3.52413 | -0.00855 |
| H | -3.16666 | -4.41078 | -0.10603 |
| O | -1.39579 | -6.01435 | -0.19548 |
| C | -0.83010 | -7.32622 | -0.27602 |
| H | -1.67736 | -8.00402 | -0.32685 |
| H | -0.21057 | -7.41861 | -1.16681 |
| H | -0.22477 | -7.53366 | 0.60511  |

|    |          |          |          |
|----|----------|----------|----------|
| 25 |          |          |          |
| 41 |          |          |          |
| C  | -0.17801 | -2.78111 | -0.00003 |
| C  | -1.59384 | -2.74960 | -0.00002 |
| C  | -2.32708 | -1.54729 | 0.00008  |
| C  | -1.56872 | -0.38096 | 0.00016  |
| C  | -0.16983 | -0.39260 | 0.00014  |
| C  | 0.53372  | -1.58053 | 0.00006  |
| C  | 0.20695  | -4.16205 | -0.00017 |
| C  | -0.94334 | -4.89063 | -0.00016 |
| H  | -2.06072 | 0.58317  | 0.00024  |
| H  | 0.36274  | 0.55168  | 0.00020  |
| H  | 1.61850  | -1.58086 | 0.00003  |
| H  | 1.21158  | -4.55632 | -0.00023 |
| H  | -3.00942 | -4.27315 | -0.00005 |
| C  | -3.80727 | -1.53479 | 0.00010  |
| C  | -4.54823 | -0.34574 | 0.00021  |
| C  | -5.92761 | -0.39792 | 0.00019  |
| H  | -4.05215 | 0.61448  | 0.00030  |
| C  | -5.76161 | -2.76119 | -0.00005 |
| C  | -6.56139 | -1.63338 | 0.00007  |
| H  | -6.50563 | 0.51971  | 0.00028  |
| H  | -6.20687 | -3.75213 | -0.00015 |
| H  | -7.64083 | -1.72103 | 0.00006  |
| N  | -2.02648 | -4.04732 | -0.00007 |
| N  | -4.43170 | -2.72268 | -0.00003 |
| H  | -1.08458 | -5.96075 | -0.00014 |

|    |          |          |          |
|----|----------|----------|----------|
| 17 |          |          |          |
| 42 |          |          |          |
| C  | -1.21908 | -0.50381 | -0.01820 |
| C  | 0.77598  | 0.65084  | -0.24124 |
| C  | -1.31252 | 1.87523  | -0.02147 |
| C  | -1.98174 | 0.69622  | 0.05788  |
| H  | -3.05645 | 0.67196  | 0.17466  |
| C  | -1.92218 | -1.82361 | 0.06534  |
| H  | -1.20138 | -2.63433 | -0.00769 |
| H  | -2.46672 | -1.91043 | 1.00922  |
| H  | -2.65521 | -1.92060 | -0.73982 |
| C  | -1.93950 | 3.22915  | 0.03880  |
| H  | -1.73443 | 3.79293  | -0.87442 |
| H  | -3.01853 | 3.15083  | 0.15672  |
| H  | -1.54349 | 3.80333  | 0.87983  |
| N  | 0.03399  | 1.82378  | -0.16737 |

|   |         |          |          |
|---|---------|----------|----------|
| N | 0.07959 | -0.51960 | -0.15909 |
| S | 2.42166 | 0.74732  | -0.42034 |
| H | 0.57518 | 2.67559  | -0.23093 |

|    |          |          |          |
|----|----------|----------|----------|
| 28 |          |          |          |
| 43 |          |          |          |
| C  | -4.62337 | -2.88105 | 0.00351  |
| C  | -3.25456 | -2.85752 | 0.00281  |
| C  | -2.55393 | -1.63934 | 0.00428  |
| C  | -3.24992 | -0.40095 | 0.00654  |
| C  | -4.67036 | -0.45858 | 0.00721  |
| C  | -5.32079 | -1.67380 | 0.00571  |
| C  | -1.11965 | -1.67715 | 0.00345  |
| C  | -2.43967 | 0.81960  | 0.00794  |
| C  | -1.02920 | 0.72547  | 0.00705  |
| C  | -0.38511 | -0.55072 | 0.00476  |
| C  | -0.28203 | 1.91476  | 0.00847  |
| H  | 0.80152  | 1.85599  | 0.00778  |
| C  | -0.91975 | 3.12719  | 0.01068  |
| C  | -2.31785 | 3.12645  | 0.01147  |
| H  | -0.63805 | -2.64882 | 0.00171  |
| H  | -5.16372 | -3.82016 | 0.00238  |
| H  | -2.68865 | -3.78271 | 0.00111  |
| H  | -6.40557 | -1.68920 | 0.00627  |
| H  | 0.69886  | -0.58909 | 0.00412  |
| H  | -0.37145 | 4.06105  | 0.01179  |
| H  | -2.86852 | 4.06275  | 0.01318  |
| N  | -3.03954 | 2.02772  | 0.01015  |
| C  | -5.57447 | 0.78224  | 0.00950  |
| H  | -4.93142 | 1.66863  | 0.01088  |
| C  | -6.40364 | 0.83887  | 1.21702  |
| N  | -7.02592 | 0.89231  | 2.17830  |
| C  | -6.40400 | 0.84301  | -1.19757 |
| N  | -7.02656 | 0.89967  | -2.15848 |



Cartesian coordinates optimized at the TD-CAM-B3LYP/6-311+G(d) level

|    |          |          |          |
|----|----------|----------|----------|
| 26 |          |          |          |
| 1  |          |          |          |
| C  | 1.95124  | 0.27266  | -0.63568 |
| C  | 3.20149  | -0.77538 | 1.15188  |
| C  | 4.35162  | -0.32444 | 0.55158  |
| C  | 4.34005  | 0.41760  | -0.62521 |
| C  | 3.08705  | 0.71910  | -1.24493 |
| C  | -0.16034 | -0.20808 | 0.03017  |
| C  | 0.68287  | -0.73678 | 0.93224  |
| H  | 3.14824  | -1.34407 | 2.06527  |
| H  | 5.29431  | -0.56398 | 1.02929  |
| H  | 5.26274  | 0.76115  | -1.06951 |
| H  | 3.02435  | 1.27803  | -2.16803 |
| H  | 0.47539  | -1.30183 | 1.82449  |
| N  | 1.97732  | -0.45539 | 0.53683  |
| N  | 0.61858  | 0.38339  | -0.97126 |
| C  | -1.63592 | -0.23355 | -0.04584 |
| C  | -2.30628 | -1.29473 | -0.59352 |
| C  | -2.38818 | 0.91259  | 0.44954  |
| C  | -3.70888 | -1.32041 | -0.65015 |
| H  | -1.74430 | -2.13744 | -0.97712 |
| C  | -3.83156 | 0.83995  | 0.38272  |
| C  | -4.46190 | -0.24840 | -0.15478 |
| H  | -4.20983 | -2.18165 | -1.07378 |
| H  | -4.37934 | 1.68797  | 0.77452  |
| H  | -5.54408 | -0.28699 | -0.20111 |
| O  | -1.81308 | 1.92128  | 0.89183  |
| H  | 0.27833  | 1.10165  | -1.58585 |
| 26 |          |          |          |
| 2  |          |          |          |
| C  | -3.45332 | 0.26419  | 0.64280  |
| C  | -4.70337 | -0.85955 | -1.09873 |
| C  | -5.85514 | -0.42926 | -0.48784 |
| C  | -5.84478 | 0.33903  | 0.67252  |
| C  | -4.59068 | 0.68959  | 1.26169  |
| C  | -1.34113 | -0.16678 | -0.05343 |
| C  | -2.18478 | -0.74142 | -0.92736 |
| H  | -4.65016 | -1.44674 | -2.00041 |
| H  | -6.79845 | -0.70667 | -0.94318 |
| H  | -6.76888 | 0.66576  | 1.12619  |
| H  | -4.52850 | 1.27003  | 2.17155  |
| H  | -1.97620 | -1.32129 | -1.80997 |

|    |          |          |          |
|----|----------|----------|----------|
| N  | -3.47838 | -0.49148 | -0.51398 |
| N  | -2.11739 | 0.42193  | 0.95342  |
| C  | 0.13426  | -0.15001 | -0.00743 |
| C  | 0.85000  | -1.19159 | 0.52218  |
| C  | 0.84433  | 1.01673  | -0.51523 |
| C  | 2.25115  | -1.18400 | 0.54744  |
| H  | 0.32545  | -2.05193 | 0.91870  |
| C  | 2.29246  | 0.99035  | -0.48497 |
| C  | 2.95190  | -0.08379 | 0.03466  |
| H  | 2.79239  | -2.02706 | 0.95429  |
| O  | 0.23539  | 2.01069  | -0.94034 |
| H  | 2.81014  | 1.85161  | -0.88535 |
| Br | 4.85051  | -0.11358 | 0.07863  |
| H  | -1.79158 | 1.18179  | 1.52490  |

|    |          |          |          |
|----|----------|----------|----------|
| 40 |          |          |          |
| 3  |          |          |          |
| C  | -3.62106 | 0.68448  | -0.11120 |
| C  | -4.87089 | -1.38534 | -0.21445 |
| C  | -6.02342 | -0.63991 | -0.16802 |
| C  | -6.01348 | 0.74943  | -0.09320 |
| C  | -4.75897 | 1.43512  | -0.07265 |
| C  | -1.50821 | -0.13455 | -0.10416 |
| C  | -2.35163 | -1.17859 | -0.16634 |
| H  | -4.81712 | -2.46022 | -0.26274 |
| H  | -6.96686 | -1.17258 | -0.18903 |
| H  | -6.93817 | 1.30629  | -0.05334 |
| H  | -4.69654 | 2.51354  | -0.03197 |
| H  | -2.14316 | -2.23344 | -0.21470 |
| N  | -3.64604 | -0.69467 | -0.17645 |
| N  | -2.28590 | 1.03000  | -0.11501 |
| C  | -0.03243 | -0.08304 | -0.09229 |
| C  | 0.69947  | -0.12958 | -1.25019 |
| C  | 0.66263  | 0.04884  | 1.18068  |
| C  | 2.10033  | -0.09713 | -1.22975 |
| H  | 0.18607  | -0.20905 | -2.20081 |
| C  | 2.10851  | 0.06839  | 1.15406  |
| C  | 2.81150  | -0.00147 | -0.01742 |
| H  | 2.64315  | -0.15493 | -2.16516 |
| H  | 2.62650  | 0.14447  | 2.10135  |
| O  | 0.03637  | 0.16283  | 2.24869  |
| N  | 4.24546  | 0.02380  | 0.00890  |
| C  | 4.81901  | 1.20100  | -0.64572 |
| H  | 5.90432  | 1.09900  | -0.57643 |

|   |          |          |          |
|---|----------|----------|----------|
| H | 4.58079  | 1.22596  | -1.72309 |
| C | 4.39764  | 2.50687  | 0.00574  |
| H | 4.65257  | 2.50794  | 1.06698  |
| H | 4.90885  | 3.34592  | -0.47069 |
| H | 3.32418  | 2.68254  | -0.08242 |
| C | 4.85624  | -1.22283 | -0.45686 |
| H | 4.61924  | -1.42179 | -1.51628 |
| H | 5.93778  | -1.07762 | -0.40870 |
| C | 4.47534  | -2.42433 | 0.39079  |
| H | 4.73025  | -2.25356 | 1.43820  |
| H | 3.40794  | -2.64456 | 0.33606  |
| H | 5.01251  | -3.31081 | 0.04738  |
| H | -1.96133 | 1.91229  | 0.23974  |

|    |          |          |          |
|----|----------|----------|----------|
| 27 |          |          |          |
| 4  |          |          |          |
| C  | 2.35061  | 0.23349  | -0.65444 |
| C  | 3.60201  | -0.73614 | 1.17600  |
| C  | 4.75281  | -0.33143 | 0.54484  |
| C  | 4.74111  | 0.34873  | -0.66873 |
| C  | 3.48694  | 0.63360  | -1.29353 |
| C  | 0.23829  | -0.18325 | 0.05236  |
| C  | 1.08311  | -0.67571 | 0.97393  |
| H  | 3.54933  | -1.25638 | 2.11789  |
| H  | 5.69618  | -0.55804 | 1.02753  |
| H  | 5.66428  | 0.65688  | -1.13729 |
| H  | 3.42376  | 1.14476  | -2.24394 |
| H  | 0.87576  | -1.19116 | 1.89580  |
| N  | 2.37692  | -0.43343 | 0.55448  |
| N  | 1.01660  | 0.34320  | -0.98625 |
| C  | -1.23609 | -0.19750 | -0.01180 |
| C  | -1.92528 | -1.27581 | -0.50882 |
| C  | -1.98080 | 0.97475  | 0.43920  |
| C  | -3.32024 | -1.29502 | -0.55534 |
| H  | -1.37727 | -2.14076 | -0.86083 |
| C  | -3.42302 | 0.91688  | 0.38381  |
| C  | -4.06278 | -0.18777 | -0.09987 |
| H  | -3.85632 | -2.15575 | -0.93258 |
| O  | -1.39338 | 1.99239  | 0.83772  |
| H  | -3.96057 | 1.78940  | 0.73861  |
| O  | -5.41190 | -0.30825 | -0.18358 |
| H  | -5.84870 | 0.48309  | 0.14887  |
| H  | 0.68111  | 1.03755  | -1.63032 |

|    |          |          |          |
|----|----------|----------|----------|
| 30 |          |          |          |
| 5  |          |          |          |
| C  | -2.75449 | 0.21582  | 0.66180  |
| C  | -4.01572 | -0.59977 | -1.23567 |
| C  | -5.16056 | -0.20350 | -0.58845 |
| C  | -5.14102 | 0.39764  | 0.66603  |
| C  | -3.88507 | 0.60637  | 1.31682  |
| C  | -0.64815 | -0.21569 | -0.05429 |
| C  | -1.49806 | -0.62395 | -1.01173 |
| H  | -3.96900 | -1.05998 | -2.20862 |
| H  | -6.10541 | -0.37216 | -1.09156 |
| H  | -6.05947 | 0.70154  | 1.14653  |
| H  | -3.81627 | 1.05387  | 2.29845  |
| H  | -1.29677 | -1.08532 | -1.96312 |
| N  | -2.78836 | -0.37180 | -0.58742 |
| N  | -1.42109 | 0.26585  | 1.00992  |
| C  | 0.82428  | -0.27547 | 0.02050  |
| C  | 1.47898  | -1.40102 | 0.46101  |
| C  | 1.60676  | 0.89759  | -0.35418 |
| C  | 2.86932  | -1.45906 | 0.51712  |
| H  | 0.90428  | -2.26936 | 0.75807  |
| C  | 3.04901  | 0.80121  | -0.29280 |
| C  | 3.65482  | -0.34769 | 0.13157  |
| H  | 3.37918  | -2.35401 | 0.84866  |
| H  | 3.59631  | 1.68294  | -0.59428 |
| O  | 1.05070  | 1.95273  | -0.69638 |
| O  | 4.98872  | -0.54151 | 0.22937  |
| C  | 5.84502  | 0.52277  | -0.14086 |
| H  | 5.67608  | 1.40073  | 0.48801  |
| H  | 6.85780  | 0.15862  | 0.00864  |
| H  | 5.70522  | 0.79317  | -1.19066 |
| H  | -1.07195 | 0.91018  | 1.69730  |

|    |          |          |          |
|----|----------|----------|----------|
| 26 |          |          |          |
| 6  |          |          |          |
| C  | -2.24682 | 0.02159  | -0.69362 |
| C  | -3.47963 | -0.47451 | 1.32916  |
| C  | -4.63701 | -0.35271 | 0.60021  |
| C  | -4.63779 | -0.04839 | -0.75750 |
| C  | -3.38902 | 0.13697  | -1.42867 |
| C  | -0.13292 | -0.01922 | 0.11833  |
| C  | -0.96625 | -0.28841 | 1.13674  |
| H  | -3.41801 | -0.69871 | 2.38106  |

|   |          |          |          |
|---|----------|----------|----------|
| H | -5.57580 | -0.50065 | 1.12075  |
| H | -5.56628 | 0.04457  | -1.30145 |
| H | -3.33452 | 0.35756  | -2.48551 |
| H | -0.74994 | -0.50303 | 2.16909  |
| N | -2.26129 | -0.27234 | 0.65590  |
| N | -0.91376 | 0.12998  | -1.03459 |
| C | 1.34156  | 0.06191  | 0.07224  |
| C | 2.10618  | -1.05998 | -0.10066 |
| C | 1.98226  | 1.36791  | 0.18203  |
| C | 3.49754  | -0.95093 | -0.12981 |
| H | 1.65519  | -2.03866 | -0.20146 |
| C | 3.42973  | 1.40101  | 0.15583  |
| C | 4.16967  | 0.26342  | 0.00133  |
| H | 3.89657  | 2.37193  | 0.26119  |
| H | 5.25232  | 0.27549  | -0.02299 |
| O | 1.31460  | 2.41042  | 0.27313  |
| F | 4.21509  | -2.06612 | -0.28082 |
| H | -0.61194 | 0.64779  | -1.84126 |

26

7

|   |          |          |          |
|---|----------|----------|----------|
| C | -2.54775 | -0.03827 | -0.69347 |
| C | -3.74182 | -0.62204 | 1.32936  |
| C | -4.90112 | -0.61601 | 0.59357  |
| C | -4.92177 | -0.32911 | -0.76792 |
| C | -3.69151 | -0.03775 | -1.43523 |
| C | -0.44370 | 0.12518  | 0.12922  |
| C | -1.25507 | -0.20820 | 1.14670  |
| H | -3.66608 | -0.82717 | 2.38423  |
| H | -5.82538 | -0.84352 | 1.11135  |
| H | -5.85167 | -0.32809 | -1.31734 |
| H | -3.65129 | 0.17434  | -2.49443 |
| H | -1.02577 | -0.39119 | 2.18236  |
| N | -2.54326 | -0.31660 | 0.65965  |
| N | -1.22843 | 0.18872  | -1.02915 |
| C | 1.01742  | 0.33824  | 0.09061  |
| C | 1.88112  | -0.71491 | -0.03143 |
| C | 1.53519  | 1.70066  | 0.15390  |
| C | 3.26851  | -0.50063 | -0.05090 |
| H | 1.50220  | -1.72627 | -0.09886 |
| C | 2.97414  | 1.85985  | 0.14276  |
| C | 3.81232  | 0.78782  | 0.04171  |
| H | 3.35407  | 2.87115  | 0.21509  |
| H | 4.88767  | 0.91418  | 0.03058  |

|    |          |          |          |
|----|----------|----------|----------|
| O  | 0.77625  | 2.68033  | 0.19312  |
| Cl | 4.32489  | -1.85789 | -0.17795 |
| H  | -0.97066 | 0.72420  | -1.83958 |

26  
8

|    |          |          |          |
|----|----------|----------|----------|
| C  | 3.14120  | -0.19242 | 0.67771  |
| C  | 4.42276  | 0.00661  | -1.36599 |
| C  | 5.50103  | -0.50514 | -0.68717 |
| C  | 5.43696  | -0.86722 | 0.65497  |
| C  | 4.20787  | -0.69324 | 1.36385  |
| C  | 1.12807  | 0.54829  | -0.05031 |
| C  | 1.98120  | 0.59893  | -1.08698 |
| H  | 4.41017  | 0.29378  | -2.40424 |
| H  | 6.42776  | -0.62668 | -1.23538 |
| H  | 6.30242  | -1.27187 | 1.15882  |
| H  | 4.11094  | -0.94240 | 2.41121  |
| H  | 1.81973  | 0.92571  | -2.09978 |
| N  | 3.21672  | 0.15388  | -0.65728 |
| N  | 1.84891  | 0.09881  | 1.06287  |
| C  | -0.29646 | 0.92707  | 0.04489  |
| C  | -0.68162 | 2.22356  | 0.22733  |
| C  | -1.29715 | -0.13562 | -0.03155 |
| C  | -2.04265 | 2.57582  | 0.29494  |
| H  | 0.07189  | 2.99729  | 0.30483  |
| C  | -2.69266 | 0.28842  | 0.02923  |
| C  | -3.03819 | 1.60792  | 0.19088  |
| H  | -2.32188 | 3.61416  | 0.42053  |
| H  | -4.08151 | 1.89308  | 0.23763  |
| O  | -0.96782 | -1.32187 | -0.11852 |
| Br | -4.01419 | -1.02960 | -0.11754 |
| H  | 1.41816  | -0.33880 | 1.85837  |

27  
9

|   |         |          |          |
|---|---------|----------|----------|
| C | 2.44854 | 0.09747  | -0.66227 |
| C | 3.59527 | -0.90413 | 1.22007  |
| C | 4.77215 | -0.73729 | 0.53542  |
| C | 4.82511 | -0.16378 | -0.73290 |
| C | 3.61128 | 0.25844  | -1.35467 |
| C | 0.32402 | 0.07207  | 0.11780  |
| C | 1.11044 | -0.47187 | 1.06174  |
| H | 3.49438 | -1.33222 | 2.20364  |
| H | 5.68470 | -1.06779 | 1.01699  |

|   |          |          |          |
|---|----------|----------|----------|
| H | 5.76891  | -0.04082 | -1.24333 |
| H | 3.59679  | 0.69160  | -2.34501 |
| H | 0.85432  | -0.88025 | 2.02437  |
| N | 2.41188  | -0.46692 | 0.59950  |
| N | 1.13579  | 0.38940  | -0.97884 |
| C | -1.13839 | 0.27294  | 0.08832  |
| C | -1.99859 | -0.76341 | -0.12057 |
| C | -1.66491 | 1.62565  | 0.26592  |
| C | -3.39978 | -0.56223 | -0.10403 |
| H | -1.61455 | -1.76251 | -0.28235 |
| C | -3.10536 | 1.78587  | 0.28804  |
| C | -3.93881 | 0.72318  | 0.10766  |
| H | -3.48322 | 2.78704  | 0.45215  |
| H | -5.01439 | 0.84956  | 0.12261  |
| O | -0.90607 | 2.59745  | 0.36578  |
| C | -4.26822 | -1.67008 | -0.29071 |
| N | -4.97280 | -2.56724 | -0.44307 |
| H | 0.90112  | 1.11208  | -1.63739 |

29

10

|   |          |          |          |
|---|----------|----------|----------|
| C | -2.25821 | 0.00796  | 0.69268  |
| C | -3.48731 | -0.50211 | -1.32867 |
| C | -4.64519 | -0.40404 | -0.59617 |
| C | -4.64793 | -0.10545 | 0.76258  |
| C | -3.40091 | 0.09988  | 1.43224  |
| C | -0.14442 | 0.00487  | -0.12347 |
| C | -0.97566 | -0.27393 | -1.14089 |
| H | -3.42388 | -0.71993 | -2.38177 |
| H | -5.58267 | -0.56622 | -1.11493 |
| H | -5.57687 | -0.03086 | 1.30875  |
| H | -3.34749 | 0.31837  | 2.48951  |
| H | -0.75849 | -0.47892 | -2.17491 |
| N | -2.27116 | -0.28072 | -0.65681 |
| N | -0.92777 | 0.13904  | 1.02870  |
| C | 1.32915  | 0.11203  | -0.07772 |
| C | 2.11718  | -0.99228 | 0.08225  |
| C | 1.94312  | 1.43012  | -0.17269 |
| C | 3.52697  | -0.91590 | 0.11799  |
| H | 1.64720  | -1.96579 | 0.17024  |
| C | 3.38678  | 1.47919  | -0.14515 |
| C | 4.13576  | 0.34391  | -0.00265 |
| H | 3.84291  | 2.45707  | -0.23823 |
| H | 5.21843  | 0.40952  | 0.01927  |

|   |          |          |          |
|---|----------|----------|----------|
| O | 1.25762  | 2.46335  | -0.25030 |
| C | 4.33816  | -2.16341 | 0.26299  |
| H | 4.20688  | -2.81835 | -0.60360 |
| H | 5.40179  | -1.94734 | 0.35944  |
| H | 4.02686  | -2.73780 | 1.13935  |
| H | -0.62784 | 0.64029  | 1.84611  |

30

11

|   |          |          |          |
|---|----------|----------|----------|
| C | -2.60598 | -0.11608 | -0.69787 |
| C | -3.82986 | -0.52112 | 1.35014  |
| C | -4.97977 | -0.57395 | 0.59994  |
| C | -4.98076 | -0.40450 | -0.78053 |
| C | -3.74001 | -0.17493 | -1.45488 |
| C | -0.51028 | 0.10168  | 0.13534  |
| C | -1.33692 | -0.13664 | 1.16636  |
| H | -3.76857 | -0.63428 | 2.41962  |
| H | -5.91218 | -0.75291 | 1.12232  |
| H | -5.90361 | -0.44714 | -1.34034 |
| H | -3.68429 | -0.05340 | -2.52744 |
| H | -1.12324 | -0.22910 | 2.21707  |
| N | -2.62131 | -0.27725 | 0.67209  |
| N | -1.28321 | 0.07629  | -1.03062 |
| C | 0.95389  | 0.30465  | 0.09172  |
| C | 1.80495  | -0.75456 | 0.00587  |
| C | 1.47784  | 1.66568  | 0.10459  |
| C | 3.20569  | -0.57233 | -0.03306 |
| H | 1.42997  | -1.76998 | -0.01964 |
| C | 2.91542  | 1.80223  | 0.07828  |
| C | 3.75155  | 0.72108  | 0.00973  |
| H | 3.30699  | 2.81130  | 0.11207  |
| H | 4.82299  | 0.86989  | -0.01165 |
| O | 0.72874  | 2.65623  | 0.11606  |
| O | 3.92667  | -1.69952 | -0.10024 |
| C | 5.34303  | -1.62098 | -0.12522 |
| H | 5.69524  | -2.64706 | -0.17595 |
| H | 5.68897  | -1.07256 | -1.00379 |
| H | 5.72447  | -1.14845 | 0.78227  |
| H | -1.00118 | 0.50538  | -1.89395 |

26

12

|   |          |          |          |
|---|----------|----------|----------|
| C | -1.11364 | 0.79411  | -0.59252 |
| C | -2.54715 | -0.87404 | 0.41994  |



|    |          |          |          |
|----|----------|----------|----------|
| C  | -3.61482 | -0.09827 | 0.03873  |
| C  | -3.49020 | 1.10247  | -0.64127 |
| C  | -2.17747 | 1.55893  | -0.97618 |
| C  | 0.91076  | -0.10947 | -0.13454 |
| C  | -0.02526 | -0.93093 | 0.36975  |
| H  | -2.60952 | -1.80441 | 0.95651  |
| H  | -4.36441 | 1.67344  | -0.91270 |
| H  | -2.02229 | 2.47940  | -1.51998 |
| H  | 0.08197  | -1.86117 | 0.89993  |
| N  | -1.26864 | -0.39137 | 0.09343  |
| N  | 0.24204  | 0.94355  | -0.76395 |
| C  | 2.38529  | -0.20897 | -0.13948 |
| C  | 3.05154  | -0.92097 | -1.10066 |
| C  | 3.14089  | 0.49273  | 0.89036  |
| C  | 4.45206  | -1.02119 | -1.09212 |
| H  | 2.48816  | -1.42899 | -1.87379 |
| C  | 4.58062  | 0.35347  | 0.86864  |
| C  | 5.20626  | -0.38262 | -0.09973 |
| H  | 4.94943  | -1.60495 | -1.85621 |
| H  | 5.12993  | 0.86163  | 1.65134  |
| H  | 6.28608  | -0.47527 | -0.10490 |
| O  | 2.57284  | 1.19866  | 1.74028  |
| Cl | -5.20932 | -0.68514 | 0.45091  |
| H  | 0.66919  | 1.82148  | -0.99979 |

26

13

|   |          |          |          |
|---|----------|----------|----------|
| C | 0.37806  | 1.02102  | -0.47536 |
| C | 1.89884  | -0.75261 | 0.16271  |
| C | 2.92612  | 0.12780  | -0.07473 |
| C | 2.73987  | 1.43314  | -0.50085 |
| C | 1.40234  | 1.89062  | -0.71776 |
| C | -1.59896 | -0.03898 | -0.17169 |
| C | -0.62045 | -0.90369 | 0.14503  |
| H | 2.00466  | -1.76822 | 0.50125  |
| H | 3.58138  | 2.08685  | -0.66874 |
| H | 1.19901  | 2.89286  | -1.06622 |
| H | -0.67949 | -1.92362 | 0.48304  |
| N | 0.59438  | -0.26876 | -0.03981 |
| N | -0.98563 | 1.14438  | -0.59103 |
| C | -3.06828 | -0.19659 | -0.17133 |
| C | -3.73120 | -0.73402 | -1.24212 |
| C | -3.82362 | 0.25860  | 0.98892  |
| C | -5.12631 | -0.89184 | -1.22937 |

|    |          |          |          |
|----|----------|----------|----------|
| H  | -3.16870 | -1.05749 | -2.10939 |
| C  | -5.25725 | 0.06683  | 0.96491  |
| C  | -5.87886 | -0.49119 | -0.11821 |
| H  | -5.62047 | -1.33520 | -2.08448 |
| H  | -5.80549 | 0.38907  | 1.84137  |
| H  | -6.95425 | -0.62570 | -0.12301 |
| O  | -3.26114 | 0.80785  | 1.95084  |
| Br | 4.69374  | -0.51479 | 0.20915  |
| H  | -1.45157 | 2.03249  | -0.64597 |

27

14

|   |          |          |          |
|---|----------|----------|----------|
| C | 1.25455  | 0.81847  | -0.51154 |
| C | 2.67872  | -0.92730 | 0.36774  |
| C | 3.76572  | -0.12575 | 0.04359  |
| C | 3.62479  | 1.12480  | -0.54439 |
| C | 2.32130  | 1.61632  | -0.84008 |
| C | -0.77288 | -0.11333 | -0.14297 |
| C | 0.15953  | -0.97415 | 0.30029  |
| H | 2.73157  | -1.89373 | 0.83676  |
| H | 4.49920  | 1.71372  | -0.77766 |
| H | 2.16509  | 2.57748  | -1.30643 |
| H | 0.04973  | -1.94050 | 0.76044  |
| N | 1.40407  | -0.41323 | 0.07896  |
| N | -0.09096 | 0.98726  | -0.66573 |
| C | -2.24815 | -0.20045 | -0.15805 |
| C | -2.91872 | -0.80545 | -1.18658 |
| C | -2.99731 | 0.39472  | 0.94109  |
| C | -4.32071 | -0.89317 | -1.18842 |
| H | -2.35988 | -1.23777 | -2.00764 |
| C | -4.43832 | 0.27254  | 0.90412  |
| C | -5.06965 | -0.35339 | -0.13575 |
| H | -4.82236 | -1.39050 | -2.00869 |
| H | -4.98386 | 0.70139  | 1.73537  |
| H | -6.15020 | -0.43495 | -0.15052 |
| O | -2.42304 | 0.99766  | 1.86264  |
| C | 5.07669  | -0.62513 | 0.33362  |
| N | 6.12675  | -1.02914 | 0.56570  |
| H | -0.51724 | 1.85699  | -0.93124 |

29

15

|   |         |          |          |
|---|---------|----------|----------|
| C | 1.50308 | 0.57591  | 0.67107  |
| C | 2.87299 | -0.87748 | -0.69489 |

|   |          |          |          |
|---|----------|----------|----------|
| C | 3.99207  | -0.24421 | -0.21585 |
| C | 3.88396  | 0.80303  | 0.70768  |
| C | 2.59837  | 1.21491  | 1.16892  |
| C | -0.55556 | -0.15930 | 0.07943  |
| C | 0.34775  | -0.88433 | -0.60034 |
| H | 2.87660  | -1.68334 | -1.41154 |
| H | 4.77338  | 1.29734  | 1.07374  |
| H | 2.48144  | 2.00768  | 1.89486  |
| H | 0.20206  | -1.68694 | -1.30272 |
| N | 1.61176  | -0.45071 | -0.24575 |
| N | 0.14923  | 0.72038  | 0.91110  |
| C | -2.03149 | -0.22633 | 0.09670  |
| C | -2.69951 | -1.13355 | 0.87558  |
| C | -2.78875 | 0.71875  | -0.71436 |
| C | -4.10150 | -1.20227 | 0.87415  |
| H | -2.13482 | -1.82144 | 1.49284  |
| C | -4.23072 | 0.60548  | -0.69599 |
| C | -4.85735 | -0.33003 | 0.08036  |
| H | -4.59981 | -1.94276 | 1.48696  |
| H | -4.78077 | 1.29769  | -1.32128 |
| H | -5.93888 | -0.40085 | 0.08686  |
| O | -2.21886 | 1.60220  | -1.37714 |
| C | 5.34556  | -0.68776 | -0.70044 |
| H | 5.87199  | 0.13463  | -1.19000 |
| H | 5.96759  | -1.02217 | 0.13293  |
| H | 5.27146  | -1.50961 | -1.41386 |
| H | -0.23963 | 1.58749  | 1.23865  |

29

16

|   |          |          |          |
|---|----------|----------|----------|
| C | 0.44658  | 0.98124  | 0.51909  |
| C | 1.95094  | -0.73774 | -0.27734 |
| C | 2.99398  | 0.11218  | 0.02284  |
| C | 2.80435  | 1.37957  | 0.55421  |
| C | 1.47571  | 1.82968  | 0.81967  |
| C | -1.53734 | -0.04772 | 0.15993  |
| C | -0.56625 | -0.88658 | -0.23741 |
| H | 2.04479  | -1.71606 | -0.71433 |
| H | 3.64927  | 2.01736  | 0.76453  |
| H | 1.27791  | 2.80301  | 1.24377  |
| H | -0.63228 | -1.87510 | -0.65723 |
| N | 0.65277  | -0.26945 | -0.02093 |
| N | -0.91096 | 1.09860  | 0.65599  |
| C | -3.00768 | -0.19826 | 0.16473  |

|   |          |          |          |
|---|----------|----------|----------|
| C | -3.66145 | -0.80387 | 1.20378  |
| C | -3.77212 | 0.33593  | -0.95507 |
| C | -5.05803 | -0.95294 | 1.19634  |
| H | -3.09185 | -1.18860 | 2.04094  |
| C | -5.20664 | 0.15130  | -0.92727 |
| C | -5.81992 | -0.47450 | 0.12332  |
| H | -5.54539 | -1.45001 | 2.02538  |
| H | -5.76246 | 0.53413  | -1.77406 |
| H | -6.89600 | -0.60305 | 0.13122  |
| O | -3.21633 | 0.94195  | -1.88608 |
| C | 4.38774  | -0.39885 | -0.17655 |
| F | 5.24387  | 0.57361  | -0.53373 |
| F | 4.45575  | -1.35196 | -1.12638 |
| F | 4.88815  | -0.95151 | 0.94955  |
| H | -1.37524 | 1.97063  | 0.83631  |

36

17

|   |          |          |          |
|---|----------|----------|----------|
| C | -0.15432 | 1.21991  | 0.27823  |
| C | 1.46818  | -0.48625 | -0.28018 |
| C | 2.47407  | 0.38315  | 0.08965  |
| C | 2.17933  | 1.66680  | 0.55522  |
| C | 0.82212  | 2.10179  | 0.63776  |
| C | -2.06943 | 0.09381  | -0.15989 |
| C | -1.04032 | -0.73057 | -0.42113 |
| H | 1.62051  | -1.46261 | -0.70975 |
| H | 2.97497  | 2.31621  | 0.89070  |
| H | 0.56206  | 3.09406  | 0.97873  |
| H | -1.04124 | -1.74523 | -0.78028 |
| N | 0.13643  | -0.05409 | -0.16215 |
| N | -1.52734 | 1.32154  | 0.23589  |
| C | -3.52701 | -0.10989 | -0.28367 |
| C | -4.17517 | 0.05373  | -1.47941 |
| C | -4.29129 | -0.46782 | 0.90493  |
| C | -5.55789 | -0.15830 | -1.59290 |
| H | -3.60767 | 0.33701  | -2.35735 |
| C | -5.71163 | -0.68798 | 0.74084  |
| C | -6.31601 | -0.53327 | -0.47613 |
| H | -6.03849 | -0.03828 | -2.55555 |
| H | -6.26432 | -0.97575 | 1.62647  |
| H | -7.38177 | -0.69856 | -0.58320 |
| O | -3.74824 | -0.55879 | 2.01875  |
| C | 3.88387  | -0.07367 | -0.01584 |
| C | 4.26687  | -1.33444 | 0.44120  |

|   |          |          |          |
|---|----------|----------|----------|
| C | 4.85755  | 0.75290  | -0.57639 |
| C | 5.58451  | -1.75822 | 0.33935  |
| H | 3.52594  | -1.97807 | 0.90234  |
| C | 6.17560  | 0.33161  | -0.67744 |
| H | 4.57046  | 1.72906  | -0.95083 |
| C | 6.54447  | -0.92664 | -0.22075 |
| H | 5.86379  | -2.73918 | 0.70839  |
| H | 6.91684  | 0.98707  | -1.12176 |
| H | 7.57451  | -1.25643 | -0.29957 |
| H | -2.03424 | 2.00913  | 0.76475  |

36

18

|   |          |          |          |
|---|----------|----------|----------|
| C | -0.78003 | 0.97920  | 0.18098  |
| C | -0.90275 | 3.39637  | 0.10319  |
| C | -2.26986 | 3.27416  | 0.02004  |
| C | -2.90771 | 2.04390  | 0.01559  |
| C | -2.15187 | 0.82489  | 0.11842  |
| C | 1.46506  | 0.71148  | 0.16744  |
| C | 1.20923  | 2.03110  | 0.15743  |
| H | -0.34216 | 4.31586  | 0.09552  |
| H | -2.85721 | 4.18301  | -0.03542 |
| H | -3.98695 | 1.99560  | -0.01128 |
| H | 1.88367  | 2.86957  | 0.14461  |
| N | -0.16291 | 2.20582  | 0.16841  |
| N | 0.23511  | 0.05781  | 0.21721  |
| C | 2.74602  | -0.02383 | 0.17425  |
| C | 3.41008  | -0.29545 | 1.34057  |
| C | 3.30056  | -0.48263 | -1.09390 |
| C | 4.63365  | -0.98431 | 1.33836  |
| H | 2.99078  | 0.03724  | 2.28220  |
| C | 4.56702  | -1.18090 | -1.05035 |
| C | 5.20427  | -1.41995 | 0.13607  |
| H | 5.14076  | -1.17277 | 2.27601  |
| H | 4.97675  | -1.50236 | -1.99968 |
| H | 6.15134  | -1.94651 | 0.15243  |
| O | 2.70410  | -0.29505 | -2.16673 |
| C | -2.78211 | -0.49735 | 0.08720  |
| C | -3.92845 | -0.71673 | -0.69145 |
| C | -2.29890 | -1.57900 | 0.83957  |
| C | -4.54454 | -1.95593 | -0.73099 |
| H | -4.32273 | 0.09516  | -1.29149 |
| C | -2.91620 | -2.82032 | 0.79592  |
| H | -1.46498 | -1.43186 | 1.51720  |

|   |          |          |          |
|---|----------|----------|----------|
| C | -4.04096 | -3.02104 | 0.00729  |
| H | -5.42321 | -2.09515 | -1.35185 |
| H | -2.52513 | -3.63260 | 1.39946  |
| H | -4.52434 | -3.99061 | -0.02537 |
| H | 0.09021  | -0.91157 | -0.01157 |

|    |          |          |          |
|----|----------|----------|----------|
| 40 |          |          |          |
| 19 |          |          |          |
| C  | 1.02724  | 1.11052  | 0.72505  |
| C  | -0.66763 | -0.45136 | -0.01371 |
| C  | -1.63720 | 0.44465  | 0.38784  |
| C  | -1.28660 | 1.67198  | 0.95764  |
| C  | 0.08865  | 2.01287  | 1.13006  |
| C  | 2.89153  | -0.04573 | 0.16445  |
| C  | 1.82762  | -0.79520 | -0.17230 |
| H  | -0.85793 | -1.37385 | -0.53737 |
| H  | -2.05594 | 2.34261  | 1.31221  |
| H  | 0.39072  | 2.94806  | 1.58048  |
| H  | 1.78495  | -1.77319 | -0.61993 |
| N  | 0.68121  | -0.10333 | 0.16858  |
| N  | 2.40516  | 1.12240  | 0.76303  |
| C  | 4.33883  | -0.31246 | 0.04151  |
| C  | 5.01447  | -1.05384 | 0.97467  |
| C  | 5.06438  | 0.25326  | -1.08904 |
| C  | 6.38616  | -1.31798 | 0.84010  |
| H  | 4.47669  | -1.45706 | 1.82395  |
| C  | 6.47398  | -0.05343 | -1.19562 |
| C  | 7.10550  | -0.81597 | -0.25226 |
| H  | 6.88836  | -1.92268 | 1.58458  |
| H  | 6.99646  | 0.35274  | -2.05276 |
| H  | 8.16306  | -1.03492 | -0.34336 |
| O  | 4.49903  | 0.98913  | -1.91556 |
| C  | -3.06427 | 0.08164  | 0.19716  |
| C  | -3.54077 | -1.19084 | 0.52603  |
| C  | -3.97354 | 0.99766  | -0.31679 |
| C  | -4.86736 | -1.53034 | 0.34633  |
| H  | -2.85862 | -1.91867 | 0.95129  |
| C  | -5.31351 | 0.67280  | -0.50312 |
| H  | -3.62802 | 1.98628  | -0.59747 |
| C  | -5.76491 | -0.59864 | -0.17080 |
| H  | -5.23645 | -2.51422 | 0.61112  |
| H  | -5.98364 | 1.41626  | -0.91403 |
| O  | -7.05103 | -1.02250 | -0.31226 |
| C  | -8.00292 | -0.11510 | -0.82065 |

|   |          |          |          |
|---|----------|----------|----------|
| H | -7.74806 | 0.20666  | -1.83498 |
| H | -8.94911 | -0.65097 | -0.84290 |
| H | -8.10212 | 0.76386  | -0.17649 |
| H | 2.93310  | 1.97568  | 0.81771  |

|    |          |          |          |
|----|----------|----------|----------|
| 42 |          |          |          |
| 20 |          |          |          |
| C  | 1.75591  | 1.16719  | -0.71513 |
| C  | 0.00611  | -0.35672 | -0.02840 |
| C  | -0.92891 | 0.57881  | -0.42881 |
| C  | -0.53542 | 1.80373  | -0.96942 |
| C  | 0.85114  | 2.10503  | -1.12268 |
| C  | 3.57735  | -0.05394 | -0.15347 |
| C  | 2.48729  | -0.77462 | 0.16274  |
| H  | -0.21910 | -1.28068 | 0.47788  |
| H  | -1.27905 | 2.50446  | -1.32065 |
| H  | 1.18735  | 3.03615  | -1.55626 |
| H  | 2.40899  | -1.75557 | 0.59862  |
| N  | 1.36704  | -0.04052 | -0.17782 |
| N  | 3.13001  | 1.13748  | -0.73264 |
| C  | 5.01505  | -0.36257 | -0.01534 |
| C  | 5.68574  | -1.09601 | -0.95793 |
| C  | 5.73552  | 0.15148  | 1.14278  |
| C  | 7.04843  | -1.39834 | -0.81003 |
| H  | 5.15179  | -1.46283 | -1.82595 |
| C  | 7.13534  | -0.19321 | 1.26152  |
| C  | 7.76256  | -0.94486 | 0.30649  |
| H  | 7.54701  | -1.99476 | -1.56350 |
| H  | 7.65416  | 0.17537  | 2.13762  |
| H  | 8.81277  | -1.19281 | 0.40732  |
| O  | 5.17453  | 0.87483  | 1.98287  |
| C  | -2.36894 | 0.25555  | -0.27305 |
| C  | -2.86320 | -1.00604 | -0.60960 |
| C  | -3.26243 | 1.20889  | 0.21748  |
| C  | -4.20579 | -1.30577 | -0.45999 |
| H  | -2.18718 | -1.75006 | -1.01486 |
| C  | -4.60717 | 0.91503  | 0.36682  |
| H  | -2.89048 | 2.18593  | 0.50284  |
| C  | -5.08854 | -0.34742 | 0.02929  |
| H  | -4.59023 | -2.28221 | -0.72831 |
| H  | -5.28787 | 1.66176  | 0.75439  |
| C  | -6.51878 | -0.71792 | 0.17069  |
| O  | -6.97783 | -1.79721 | -0.10773 |
| O  | -7.27109 | 0.28724  | 0.64965  |

|   |          |          |          |
|---|----------|----------|----------|
| C | -8.65975 | 0.00009  | 0.81224  |
| H | -9.10446 | 0.91175  | 1.20219  |
| H | -9.10931 | -0.26609 | -0.14383 |
| H | -8.80026 | -0.82336 | 1.51169  |
| H | 3.69239  | 1.96509  | -0.82131 |

|    |          |          |          |
|----|----------|----------|----------|
| 40 |          |          |          |
| 21 |          |          |          |
| C  | 0.14030  | 1.43783  | 0.16819  |
| C  | 0.70443  | 3.78817  | 0.00822  |
| C  | -0.64205 | 4.05540  | -0.04812 |
| C  | -1.60332 | 3.05594  | 0.00116  |
| C  | -1.21465 | 1.67822  | 0.13217  |
| C  | 2.21914  | 0.54394  | 0.13426  |
| C  | 2.34687  | 1.88109  | 0.08182  |
| H  | 1.49978  | 4.51305  | -0.03921 |
| H  | -0.94905 | 5.09171  | -0.12644 |
| H  | -2.65339 | 3.31159  | -0.00530 |
| H  | 3.23203  | 2.49144  | 0.03303  |
| N  | 1.08318  | 2.43999  | 0.10648  |
| N  | 0.85466  | 0.26401  | 0.22906  |
| C  | 3.24053  | -0.52229 | 0.15254  |
| C  | 3.83864  | -0.92282 | 1.31800  |
| C  | 3.60142  | -1.17270 | -1.10158 |
| C  | 4.81887  | -1.92731 | 1.32549  |
| H  | 3.55952  | -0.44703 | 2.25011  |
| C  | 4.62252  | -2.19633 | -1.04908 |
| C  | 5.20550  | -2.55546 | 0.13469  |
| H  | 5.28305  | -2.21220 | 2.26109  |
| H  | 4.89458  | -2.65927 | -1.98939 |
| H  | 5.96716  | -3.32609 | 0.15839  |
| O  | 3.04379  | -0.87215 | -2.16989 |
| C  | -2.19591 | 0.58391  | 0.16040  |
| C  | -3.34773 | 0.63911  | -0.62502 |
| C  | -2.04591 | -0.54022 | 0.98772  |
| C  | -4.30004 | -0.37296 | -0.60998 |
| H  | -3.49901 | 1.48754  | -1.28262 |
| C  | -2.98128 | -1.55629 | 1.00808  |
| H  | -1.20101 | -0.59841 | 1.66535  |
| C  | -4.11733 | -1.48353 | 0.20552  |
| H  | -5.17116 | -0.28282 | -1.24566 |
| H  | -2.86164 | -2.41392 | 1.65982  |
| O  | -4.98352 | -2.53165 | 0.29452  |
| C  | -6.15482 | -2.49785 | -0.48918 |



|   |          |          |          |
|---|----------|----------|----------|
| H | -6.69527 | -3.41464 | -0.26485 |
| H | -6.78282 | -1.63865 | -0.23428 |
| H | -5.92145 | -2.47053 | -1.55796 |
| H | 0.44058  | -0.62449 | 0.00031  |

|    |          |          |          |
|----|----------|----------|----------|
| 42 |          |          |          |
| 22 |          |          |          |
| C  | -1.03395 | 1.60538  | -0.08417 |
| C  | -2.00003 | 3.81676  | -0.00570 |
| C  | -0.72827 | 4.32244  | 0.05614  |
| C  | 0.39437  | 3.49670  | 0.03592  |
| C  | 0.29767  | 2.08692  | -0.06646 |
| C  | -2.89769 | 0.36387  | -0.00079 |
| C  | -3.27472 | 1.66140  | -0.01201 |
| H  | -2.91914 | 4.37906  | 0.00448  |
| H  | -0.60110 | 5.39659  | 0.10862  |
| H  | 1.37491  | 3.95254  | 0.05179  |
| H  | -4.24540 | 2.12334  | 0.02210  |
| N  | -2.11088 | 2.42852  | -0.06535 |
| N  | -1.51913 | 0.34514  | -0.05249 |
| C  | -3.69645 | -0.87316 | 0.01899  |
| C  | -5.02483 | -0.86107 | -0.32400 |
| C  | -3.06341 | -2.12746 | 0.40303  |
| C  | -5.80320 | -2.02662 | -0.27373 |
| H  | -5.49140 | 0.06331  | -0.64555 |
| C  | -3.89860 | -3.29914 | 0.43726  |
| C  | -5.22946 | -3.24121 | 0.11186  |
| H  | -6.85117 | -1.97969 | -0.54187 |
| H  | -3.41842 | -4.22418 | 0.73132  |
| H  | -5.83838 | -4.13721 | 0.14502  |
| O  | -1.84435 | -2.19066 | 0.68438  |
| C  | 1.44004  | 1.20097  | -0.09812 |
| C  | 2.65657  | 1.58424  | 0.51089  |
| C  | 1.42361  | -0.04746 | -0.76041 |
| C  | 3.76484  | 0.76931  | 0.48300  |
| H  | 2.71071  | 2.52325  | 1.04889  |
| C  | 2.53683  | -0.85854 | -0.79072 |
| H  | 0.55140  | -0.35624 | -1.32315 |
| C  | 3.72527  | -0.47151 | -0.16597 |
| H  | 4.67603  | 1.08123  | 0.97722  |
| H  | 2.51085  | -1.80508 | -1.31670 |
| C  | 4.88161  | -1.37690 | -0.22874 |
| O  | 4.89379  | -2.45208 | -0.78198 |
| O  | 5.96732  | -0.88519 | 0.40734  |

|   |          |          |          |
|---|----------|----------|----------|
| C | 7.12353  | -1.71726 | 0.38621  |
| H | 7.44894  | -1.89810 | -0.63810 |
| H | 7.88757  | -1.17444 | 0.93715  |
| H | 6.91738  | -2.67477 | 0.86419  |
| H | -0.99907 | -0.50777 | 0.12683  |

29

23

|    |          |          |          |
|----|----------|----------|----------|
| C  | 1.43798  | 0.26099  | 0.96078  |
| C  | 2.84444  | -0.41132 | -0.89191 |
| C  | 3.92467  | -0.17668 | -0.07625 |
| C  | 3.81981  | 0.26771  | 1.23179  |
| C  | 2.51373  | 0.48583  | 1.77113  |
| C  | -0.59798 | 0.05855  | -0.00840 |
| C  | 0.32433  | -0.28562 | -0.92267 |
| H  | 2.89226  | -0.74699 | -1.91288 |
| H  | 4.70367  | 0.44062  | 1.82577  |
| H  | 2.37217  | 0.81541  | 2.79014  |
| H  | 0.20294  | -0.60994 | -1.94146 |
| N  | 1.57458  | -0.16985 | -0.34114 |
| N  | 0.08383  | 0.36432  | 1.17216  |
| C  | -2.07360 | 0.09854  | -0.08738 |
| C  | -2.82858 | -1.01392 | 0.15330  |
| C  | -2.72581 | 1.36390  | -0.39772 |
| C  | -4.23874 | -1.00005 | 0.07404  |
| H  | -2.33134 | -1.94594 | 0.39928  |
| C  | -4.16776 | 1.34767  | -0.48375 |
| C  | -4.88232 | 0.20478  | -0.25240 |
| H  | -4.65169 | 2.28317  | -0.73578 |
| H  | -5.96490 | 0.22139  | -0.31978 |
| O  | -2.07398 | 2.40913  | -0.55806 |
| Cl | 5.50970  | -0.46247 | -0.75693 |
| C  | -5.01170 | -2.25614 | 0.31842  |
| H  | -4.77630 | -3.01339 | -0.43532 |
| H  | -4.76064 | -2.69195 | 1.28899  |
| H  | -6.08707 | -2.08277 | 0.29292  |
| H  | -0.31185 | 0.89258  | 1.92927  |

32

24

|   |          |          |          |
|---|----------|----------|----------|
| C | -0.77317 | -0.43020 | 1.04173  |
| C | -2.25325 | 0.30712  | -0.72394 |
| C | -3.30959 | -0.00137 | 0.10678  |
| C | -3.13883 | -0.52166 | 1.38126  |

|   |          |          |          |
|---|----------|----------|----------|
| C | -1.81550 | -0.73825 | 1.87175  |
| C | 1.22544  | -0.10085 | 0.03100  |
| C | 0.26627  | 0.26746  | -0.83428 |
| H | -2.33406 | 0.68580  | -1.72739 |
| H | -3.99437 | -0.75972 | 1.99467  |
| H | -1.63136 | -1.12981 | 2.86123  |
| H | 0.34610  | 0.65407  | -1.83520 |
| N | -0.96168 | 0.07288  | -0.22663 |
| N | 0.58412  | -0.50686 | 1.20411  |
| C | 2.69887  | -0.09197 | -0.08975 |
| C | 3.42919  | 1.02246  | 0.20965  |
| C | 3.37527  | -1.31202 | -0.50943 |
| C | 4.83680  | 1.05510  | 0.09320  |
| H | 2.91419  | 1.92024  | 0.53406  |
| C | 4.81351  | -1.24812 | -0.63026 |
| C | 5.50309  | -0.10454 | -0.33526 |
| H | 5.31528  | -2.14878 | -0.96176 |
| H | 6.58343  | -0.08510 | -0.43131 |
| O | 2.74709  | -2.36008 | -0.73203 |
| C | -4.69118 | 0.31072  | -0.37971 |
| F | -5.60638 | -0.55810 | 0.08287  |
| F | -4.77920 | 0.29677  | -1.72417 |
| F | -5.09918 | 1.53727  | 0.01229  |
| C | 5.58194  | 2.31271  | 0.40574  |
| H | 5.33783  | 2.67884  | 1.40632  |
| H | 6.66067  | 2.17000  | 0.35070  |
| H | 5.31360  | 3.11017  | -0.29363 |
| H | 1.02444  | -1.02020 | 1.94647  |

46

25

|   |          |          |          |
|---|----------|----------|----------|
| C | -0.18937 | 0.17404  | -0.20410 |
| C | 1.39559  | -1.65564 | -0.20931 |
| C | 2.41756  | -0.73178 | -0.09737 |
| C | 2.14362  | 0.63058  | -0.03688 |
| C | 0.80173  | 1.13398  | -0.11618 |
| C | -2.12149 | -0.99701 | -0.21583 |
| C | -1.10588 | -1.87848 | -0.24226 |
| H | 1.52050  | -2.71911 | -0.32525 |
| H | 2.96120  | 1.33086  | 0.05740  |
| H | -1.11954 | -2.95431 | -0.26425 |
| N | 0.08155  | -1.16938 | -0.23731 |
| N | -1.55551 | 0.27586  | -0.22444 |
| C | -3.58289 | -1.20745 | -0.21740 |

|   |          |          |          |
|---|----------|----------|----------|
| C | -4.28283 | -1.37196 | -1.38305 |
| C | -4.29146 | -1.22212 | 1.05703  |
| C | -5.67042 | -1.58491 | -1.37431 |
| H | -3.75567 | -1.35006 | -2.32895 |
| C | -5.71917 | -1.45323 | 1.01952  |
| C | -6.37801 | -1.62647 | -0.16642 |
| H | -6.19394 | -1.72449 | -2.31145 |
| H | -6.23191 | -1.47874 | 1.97283  |
| H | -7.44827 | -1.79618 | -0.17830 |
| O | -3.69666 | -1.02937 | 2.12980  |
| C | 0.49048  | 2.56221  | -0.02686 |
| C | 1.26857  | 3.40985  | 0.77663  |
| C | -0.56369 | 3.14697  | -0.74611 |
| C | 0.99313  | 4.76321  | 0.87098  |
| H | 2.08452  | 2.99041  | 1.35357  |
| C | -0.83886 | 4.50275  | -0.64764 |
| H | -1.13780 | 2.54536  | -1.44241 |
| C | -0.06655 | 5.32177  | 0.16490  |
| H | 1.60723  | 5.38877  | 1.51007  |
| H | -1.65278 | 4.92570  | -1.22700 |
| H | -0.28057 | 6.38159  | 0.24064  |
| C | 3.81979  | -1.21950 | -0.04911 |
| C | 4.17403  | -2.30221 | 0.75586  |
| C | 4.81412  | -0.60481 | -0.81016 |
| C | 5.48428  | -2.75720 | 0.79996  |
| H | 3.41679  | -2.77563 | 1.37098  |
| C | 6.12487  | -1.05752 | -0.76584 |
| H | 4.55042  | 0.22564  | -1.45531 |
| C | 6.46540  | -2.13639 | 0.03901  |
| H | 5.74117  | -3.59492 | 1.43923  |
| H | 6.88248  | -0.56925 | -1.36920 |
| H | 7.48969  | -2.49074 | 0.07352  |
| H | -2.03783 | 1.12263  | 0.02730  |

52

26

|   |          |         |          |
|---|----------|---------|----------|
| C | -1.32564 | 3.28490 | 0.20771  |
| C | -3.30241 | 2.30126 | -0.77155 |
| C | -3.82559 | 3.56711 | -0.88163 |
| C | -3.14008 | 4.69985 | -0.45699 |
| C | -1.83832 | 4.54517 | 0.11141  |
| C | -0.05554 | 1.43328 | 0.48543  |
| C | -1.22921 | 1.03238 | -0.04281 |
| H | -3.78739 | 1.40071 | -1.10574 |

|   |          |          |          |
|---|----------|----------|----------|
| H | -4.81092 | 3.66509  | -1.32215 |
| H | -3.57839 | 5.68201  | -0.55757 |
| H | -1.26177 | 5.39062  | 0.46039  |
| N | -2.02029 | 2.16494  | -0.20689 |
| N | -0.12451 | 2.82009  | 0.69520  |
| C | 1.14165  | 0.66208  | 0.87510  |
| C | 1.24750  | 0.06583  | 2.10262  |
| C | 2.25125  | 0.57243  | -0.06705 |
| C | 2.39317  | -0.66490 | 2.44888  |
| H | 0.43366  | 0.15241  | 2.81210  |
| C | 3.42871  | -0.20847 | 0.31478  |
| C | 3.46133  | -0.79718 | 1.55474  |
| H | 2.44949  | -1.13974 | 3.42064  |
| H | 4.32436  | -1.37588 | 1.86059  |
| O | 2.20831  | 1.15990  | -1.15929 |
| C | -1.71191 | -0.33322 | -0.38934 |
| H | -2.16297 | -0.32305 | -1.38641 |
| H | -0.85157 | -1.00031 | -0.46063 |
| C | -2.71907 | -0.90947 | 0.62460  |
| H | -2.23560 | -0.96554 | 1.60355  |
| H | -3.56078 | -0.22249 | 0.73876  |
| C | -3.22059 | -2.27155 | 0.21898  |
| C | -4.39018 | -2.41131 | -0.52423 |
| C | -2.50562 | -3.42146 | 0.54768  |
| C | -4.83370 | -3.66276 | -0.93058 |
| H | -4.96743 | -1.52863 | -0.78269 |
| C | -2.94408 | -4.67525 | 0.14516  |
| H | -1.59521 | -3.33432 | 1.13342  |
| C | -4.11074 | -4.79984 | -0.59750 |
| H | -5.74938 | -3.74967 | -1.50531 |
| H | -2.37531 | -5.55835 | 0.41554  |
| H | -4.45675 | -5.77846 | -0.91102 |
| C | 4.53210  | -0.29824 | -0.69471 |
| H | 4.10190  | -0.65461 | -1.63645 |
| H | 4.86747  | 0.71743  | -0.92823 |
| C | 5.73120  | -1.16155 | -0.30650 |
| H | 6.20273  | -0.77753 | 0.60302  |
| H | 5.39027  | -2.17892 | -0.08040 |
| C | 6.74992  | -1.22427 | -1.40483 |
| H | 6.39874  | -1.62020 | -2.35660 |
| C | 8.01112  | -0.83315 | -1.29831 |
| H | 8.70101  | -0.90183 | -2.13165 |
| H | 8.40678  | -0.42830 | -0.37133 |
| H | 0.69269  | 3.40517  | 0.71796  |

|    |          |          |          |
|----|----------|----------|----------|
| 26 |          |          |          |
| 27 |          |          |          |
| C  | 2.86974  | -0.68913 | -0.00001 |
| C  | 4.12482  | 1.37845  | 0.00011  |
| C  | 5.27683  | 0.63269  | 0.00009  |
| C  | 5.25439  | -0.76260 | 0.00001  |
| C  | 4.01965  | -1.45331 | -0.00003 |
| C  | 0.76816  | 0.12188  | 0.00001  |
| C  | 1.61434  | 1.18051  | 0.00008  |
| H  | 4.06492  | 2.45463  | 0.00017  |
| H  | 6.22386  | 1.15819  | 0.00012  |
| H  | 6.18197  | -1.31853 | -0.00001 |
| H  | 3.95601  | -2.53174 | -0.00009 |
| H  | 1.42121  | 2.23699  | 0.00013  |
| N  | 2.90747  | 0.68197  | 0.00006  |
| N  | 1.55560  | -1.02413 | -0.00004 |
| C  | -0.69836 | 0.04643  | -0.00001 |
| C  | -1.46811 | 1.17148  | 0.00002  |
| C  | -1.37259 | -1.25039 | -0.00004 |
| C  | -2.87662 | 1.14360  | -0.00000 |
| C  | -2.81417 | -1.23241 | -0.00006 |
| C  | -3.54528 | -0.06727 | -0.00004 |
| O  | -0.76165 | -2.33506 | -0.00006 |
| F  | -0.91447 | 2.38870  | 0.00005  |
| F  | -3.54831 | 2.28125  | 0.00002  |
| F  | -4.87350 | -0.08987 | -0.00006 |
| F  | -3.44867 | -2.39034 | -0.00010 |
| H  | 1.15157  | -1.95114 | -0.00009 |

|    |          |          |          |
|----|----------|----------|----------|
| 26 |          |          |          |
| 28 |          |          |          |
| C  | -4.08489 | -1.22814 | -0.07406 |
| C  | -4.54393 | 0.07341  | -0.08319 |
| C  | -3.62964 | 1.12906  | -0.03101 |
| C  | -2.22692 | 0.91692  | 0.06397  |
| C  | -1.75976 | -0.47227 | 0.06581  |
| C  | -2.68963 | -1.48309 | -0.02252 |
| H  | -4.77524 | -2.06194 | -0.11466 |
| H  | -5.60642 | 0.28030  | -0.13517 |
| H  | -3.96462 | 2.15958  | -0.00650 |
| H  | -2.34925 | -2.51371 | -0.06134 |
| C  | -0.35917 | -0.78016 | 0.13486  |
| H  | -0.03730 | -1.78450 | 0.37561  |

|   |          |          |          |
|---|----------|----------|----------|
| C | 1.94828  | 0.02152  | -0.04757 |
| C | 2.72202  | 1.18973  | -0.08285 |
| C | 2.58853  | -1.22254 | 0.00877  |
| C | 4.10104  | 1.11231  | -0.05774 |
| H | 2.22646  | 2.15430  | -0.12181 |
| C | 3.97240  | -1.28230 | 0.03295  |
| H | 2.01611  | -2.14142 | 0.01312  |
| C | 4.73858  | -0.12391 | 0.00227  |
| H | 4.68550  | 2.02515  | -0.08281 |
| H | 4.45834  | -2.25100 | 0.07161  |
| H | 5.82036  | -0.18235 | 0.02181  |
| O | -1.41064 | 1.87794  | 0.16405  |
| H | 0.16213  | 1.10433  | -0.13460 |
| N | 0.56966  | 0.15492  | -0.08512 |

|    |          |          |          |
|----|----------|----------|----------|
| 25 |          |          |          |
| 29 |          |          |          |
| C  | 1.94998  | -0.74372 | 0.00004  |
| C  | 1.93113  | 0.65191  | -0.00027 |
| C  | 3.11609  | 1.37504  | -0.00023 |
| C  | 4.29938  | 0.64072  | 0.00014  |
| C  | 4.30232  | -0.75204 | 0.00042  |
| C  | 3.10901  | -1.47974 | 0.00037  |
| C  | -0.15932 | -0.11945 | -0.00033 |
| H  | 3.12085  | 2.45774  | -0.00045 |
| H  | 5.24486  | 1.17044  | 0.00019  |
| H  | 5.24609  | -1.28364 | 0.00068  |
| H  | 3.09289  | -2.56203 | 0.00058  |
| C  | -1.57268 | -0.22592 | -0.00015 |
| C  | -2.36285 | 1.01359  | 0.00018  |
| C  | -2.21811 | -1.44566 | -0.00028 |
| C  | -3.77173 | 0.88167  | 0.00030  |
| C  | -3.63871 | -1.52274 | -0.00007 |
| H  | -1.63782 | -2.36107 | -0.00054 |
| C  | -4.40244 | -0.37352 | 0.00019  |
| H  | -4.34719 | 1.79996  | 0.00059  |
| H  | -4.10939 | -2.49865 | -0.00013 |
| H  | -5.48413 | -0.43518 | 0.00033  |
| N  | 0.60244  | 0.99987  | -0.00064 |
| O  | 0.65627  | -1.20669 | -0.00017 |
| O  | -1.77525 | 2.13330  | 0.00040  |
| H  | 0.11621  | 1.89969  | -0.00058 |

|    |  |  |  |
|----|--|--|--|
| 25 |  |  |  |
|----|--|--|--|

| 30 |          |          |          |
|----|----------|----------|----------|
| C  | -2.11428 | 0.65058  | 0.13706  |
| C  | -1.87790 | -0.61140 | -0.41622 |
| C  | -2.93622 | -1.48387 | -0.64224 |
| C  | -4.22001 | -1.07793 | -0.30724 |
| C  | -4.45410 | 0.18160  | 0.23573  |
| C  | -3.39755 | 1.05594  | 0.46166  |
| C  | 0.28559  | 0.24154  | -0.39071 |
| H  | -2.75843 | -2.46124 | -1.07672 |
| H  | -5.05110 | -1.75248 | -0.47773 |
| H  | -5.46349 | 0.48412  | 0.48747  |
| H  | -3.57421 | 2.03447  | 0.89283  |
| C  | 1.74636  | 0.09966  | -0.30331 |
| C  | 2.32577  | -0.50667 | 0.88504  |
| C  | 2.57674  | 0.50457  | -1.33181 |
| C  | 3.76987  | -0.60644 | 0.95976  |
| C  | 3.95723  | 0.37921  | -1.22728 |
| H  | 2.13934  | 0.94015  | -2.22227 |
| C  | 4.54835  | -0.17468 | -0.06969 |
| H  | 4.18941  | -1.03813 | 1.86078  |
| H  | 4.58995  | 0.71727  | -2.03917 |
| H  | 5.62831  | -0.25350 | -0.01172 |
| N  | -0.54085 | -0.83826 | -0.69804 |
| O  | 1.59291  | -0.95057 | 1.78629  |
| H  | -0.17303 | -1.77549 | -0.62930 |
| S  | -0.60895 | 1.54154  | 0.36670  |

| 24 |          |          |          |
|----|----------|----------|----------|
| 31 |          |          |          |
| C  | -0.76847 | -0.15669 | 0.00004  |
| C  | 0.66289  | -0.10719 | -0.00015 |
| C  | 1.48978  | -1.33036 | -0.00052 |
| C  | -1.54104 | 1.01423  | -0.00029 |
| C  | 1.28329  | 1.15771  | -0.00005 |
| C  | 0.48822  | 2.33791  | -0.00040 |
| C  | -0.87704 | 2.25754  | -0.00067 |
| C  | 2.70386  | 1.23220  | 0.00048  |
| C  | 3.48359  | 0.08864  | 0.00093  |
| C  | 2.90671  | -1.16711 | 0.00060  |
| H  | 3.50093  | -2.07246 | 0.00062  |
| H  | 4.56426  | 0.18246  | 0.00148  |
| H  | -0.76141 | -2.17160 | 0.00050  |
| C  | -2.74781 | -1.50561 | 0.00083  |
| C  | -3.54821 | -0.36889 | 0.00028  |



|   |          |          |          |
|---|----------|----------|----------|
| C | -2.97711 | 0.88009  | -0.00013 |
| H | -3.12898 | -2.51582 | 0.00134  |
| H | -4.62456 | -0.48911 | 0.00015  |
| H | 3.17074  | 2.21059  | 0.00072  |
| H | 0.98298  | 3.30194  | -0.00042 |
| H | -1.47456 | 3.16325  | -0.00103 |
| H | -3.59111 | 1.77239  | -0.00030 |
| N | -1.39748 | -1.36559 | 0.00116  |
| O | 0.97401  | -2.47715 | -0.00211 |

|    |          |          |          |
|----|----------|----------|----------|
| 29 |          |          |          |
| 32 |          |          |          |
| C  | 4.42252  | -1.46729 | 0.26821  |
| C  | 3.14186  | -2.01110 | 0.28448  |
| C  | 2.03220  | -1.21063 | 0.10026  |
| C  | 2.17132  | 0.18250  | -0.10394 |
| C  | 3.48209  | 0.72021  | -0.11672 |
| C  | 4.57703  | -0.09600 | 0.06533  |
| C  | 1.05238  | 1.01459  | -0.28723 |
| C  | -0.35094 | 0.55764  | -0.33164 |
| C  | -0.93572 | 0.09153  | -1.49861 |
| C  | -2.24797 | -0.33696 | -1.51503 |
| H  | -2.70544 | -0.71837 | -2.41905 |
| C  | -3.04212 | -0.30142 | -0.33341 |
| C  | -2.51907 | 0.17007  | 0.83305  |
| C  | -1.15062 | 0.63757  | 0.88154  |
| H  | 5.28920  | -2.10110 | 0.41268  |
| H  | 3.00913  | -3.07557 | 0.44384  |
| H  | 3.60987  | 1.78387  | -0.26655 |
| H  | 5.57109  | 0.33781  | 0.05372  |
| H  | -3.08059 | 0.22964  | 1.75479  |
| H  | 1.04678  | -1.65744 | 0.11664  |
| H  | -0.34875 | 0.04231  | -2.40808 |
| O  | 1.27820  | 2.32595  | -0.56330 |
| O  | -0.66652 | 1.12344  | 1.91670  |
| H  | 0.49695  | 2.85455  | -0.37710 |
| O  | -4.30102 | -0.75881 | -0.50292 |
| C  | -5.16322 | -0.76633 | 0.61994  |
| H  | -6.10850 | -1.17198 | 0.26965  |
| H  | -4.76494 | -1.40049 | 1.41603  |
| H  | -5.31849 | 0.24582  | 1.00225  |

|    |  |  |  |
|----|--|--|--|
| 36 |  |  |  |
| 33 |  |  |  |

|   |          |          |          |
|---|----------|----------|----------|
| C | -4.51097 | -2.35417 | 0.00099  |
| C | -3.12462 | -2.22217 | 0.00018  |
| C | -2.56245 | -0.96067 | -0.00034 |
| C | -3.36821 | 0.19810  | 0.00000  |
| C | -4.77029 | 0.03845  | 0.00086  |
| C | -5.32804 | -1.22428 | 0.00132  |
| H | -4.95176 | -3.34431 | 0.00135  |
| H | -2.47306 | -3.08774 | -0.00010 |
| C | -2.70478 | 1.43299  | -0.00044 |
| H | -5.39068 | 0.92583  | 0.00114  |
| H | -6.40595 | -1.33745 | 0.00196  |
| C | -1.27427 | 1.51551  | -0.00059 |
| C | -0.51795 | 0.31012  | -0.00073 |
| O | -1.20167 | -0.88718 | -0.00146 |
| O | -3.37696 | 2.58288  | -0.00035 |
| O | -0.77517 | 2.68257  | -0.00046 |
| H | -2.69351 | 3.28304  | -0.00037 |
| C | 0.89307  | 0.16059  | -0.00042 |
| C | 1.48065  | -1.12815 | -0.00079 |
| C | 1.78208  | 1.26404  | 0.00029  |
| C | 2.84294  | -1.30452 | -0.00060 |
| H | 0.83935  | -1.99920 | -0.00115 |
| C | 3.14237  | 1.08792  | 0.00047  |
| H | 1.37115  | 2.26327  | 0.00065  |
| C | 3.72437  | -0.20162 | -0.00009 |
| H | 3.23153  | -2.31384 | -0.00073 |
| H | 3.77107  | 1.96788  | 0.00101  |
| N | 5.08302  | -0.37102 | -0.00014 |
| C | 5.65010  | -1.70251 | -0.00053 |
| H | 5.34969  | -2.27141 | -0.88665 |
| H | 6.73506  | -1.63222 | -0.00186 |
| H | 5.35173  | -2.27140 | 0.88635  |
| C | 5.96171  | 0.77974  | 0.00203  |
| H | 5.81186  | 1.40366  | 0.88912  |
| H | 6.99545  | 0.44280  | 0.00239  |
| H | 5.81323  | 1.40591  | -0.88369 |

31

34

|   |          |          |          |
|---|----------|----------|----------|
| C | -4.36312 | -0.94243 | 0.32245  |
| C | -3.68590 | 0.25785  | 0.42211  |
| C | -2.31854 | 0.32254  | 0.16576  |
| C | -1.61932 | -0.84622 | -0.19405 |
| C | -2.32185 | -2.05951 | -0.30161 |

|   |          |          |          |
|---|----------|----------|----------|
| C | -3.67502 | -2.10178 | -0.04375 |
| C | -1.63031 | 1.62801  | 0.24805  |
| C | -0.21004 | -0.78795 | -0.44137 |
| C | 0.51212  | 0.42702  | -0.30316 |
| C | -0.17961 | 1.63380  | -0.03580 |
| C | 0.49680  | 2.84717  | -0.05259 |
| H | -0.06841 | 3.74690  | 0.15565  |
| C | 1.84589  | 2.89194  | -0.33755 |
| C | 2.55760  | 1.71137  | -0.56787 |
| C | 1.91951  | 0.49474  | -0.50140 |
| H | -5.42732 | -0.98410 | 0.52368  |
| H | -4.19620 | 1.17360  | 0.69414  |
| H | -1.78658 | -2.95612 | -0.58429 |
| H | -4.20737 | -3.04266 | -0.12616 |
| H | 2.37057  | 3.83966  | -0.35681 |
| H | 3.62440  | 1.73504  | -0.74445 |
| O | -2.23246 | 2.65370  | 0.52225  |
| O | 0.35333  | -1.92787 | -0.85797 |
| N | 2.62152  | -0.72337 | -0.63790 |
| C | 3.28912  | -1.18018 | 0.48498  |
| H | 1.28499  | -1.77751 | -1.12618 |
| O | 3.87955  | -0.38968 | 1.19910  |
| C | 3.36592  | -2.66890 | 0.64850  |
| H | 2.36540  | -3.10514 | 0.69136  |
| H | 3.88088  | -3.11094 | -0.20635 |
| H | 3.90617  | -2.90929 | 1.56160  |

|    |          |          |          |
|----|----------|----------|----------|
| 19 |          |          |          |
| 35 |          |          |          |
| C  | 2.48908  | 0.91619  | 0.01314  |
| C  | 1.09083  | 0.97665  | -0.01144 |
| C  | 0.31262  | -0.26067 | -0.00228 |
| C  | 0.99768  | -1.48900 | -0.00310 |
| C  | 2.38042  | -1.49852 | 0.01008  |
| C  | 3.13381  | -0.30511 | 0.02165  |
| H  | 3.02778  | 1.85527  | 0.01179  |
| H  | 0.41661  | -2.39922 | -0.00929 |
| H  | 2.89860  | -2.45031 | 0.01366  |
| H  | 4.21557  | -0.34978 | 0.03347  |
| C  | -3.02261 | 0.56076  | 0.03639  |
| H  | -3.91594 | -1.48513 | -0.04313 |
| H  | -3.83564 | 1.26834  | 0.07020  |
| N  | -1.75060 | 0.97460  | 0.06114  |
| N  | -1.03990 | -0.21347 | -0.00101 |

|   |          |          |          |
|---|----------|----------|----------|
| N | -1.82231 | -1.34042 | -0.03850 |
| C | -3.05685 | -0.83313 | -0.01992 |
| O | 0.50425  | 2.14882  | -0.05775 |
| H | -0.50117 | 2.02229  | -0.03329 |

21

36

|   |          |          |          |
|---|----------|----------|----------|
| C | -3.69320 | 0.26531  | 0.00001  |
| C | -2.64361 | 1.17233  | -0.00004 |
| C | -1.33793 | 0.70992  | -0.00003 |
| C | -1.04240 | -0.67485 | 0.00004  |
| C | -2.12900 | -1.56565 | 0.00009  |
| C | -3.42971 | -1.10353 | 0.00007  |
| H | -0.39128 | 2.58928  | -0.00035 |
| H | -4.71454 | 0.62617  | -0.00000 |
| H | -2.83933 | 2.24016  | -0.00008 |
| H | -1.90390 | -2.62490 | 0.00014  |
| H | -4.25137 | -1.81026 | 0.00011  |
| C | 1.22611  | -0.23897 | 0.00008  |
| C | 1.01595  | 1.12985  | -0.00009 |
| N | 0.23259  | -1.15384 | 0.00009  |
| N | -0.25076 | 1.59014  | -0.00009 |
| O | 1.95499  | 2.05374  | -0.00009 |
| C | 2.60690  | -0.72909 | 0.00004  |
| O | 2.80111  | -1.99362 | -0.00046 |
| N | 3.62465  | 0.06473  | 0.00041  |
| H | 4.52947  | -0.39710 | 0.00044  |
| H | 2.83811  | 1.59657  | 0.00024  |

19

37

|   |          |         |         |
|---|----------|---------|---------|
| C | 0.10337  | 3.56360 | 3.66249 |
| C | -1.26405 | 3.60118 | 3.75290 |
| C | -1.98784 | 2.47427 | 4.26557 |
| C | -1.27509 | 1.36469 | 4.66016 |
| C | 0.14296  | 1.32891 | 4.56514 |
| C | 0.88955  | 2.42866 | 4.06174 |
| C | 0.60142  | 4.76927 | 3.13504 |
| C | -0.50850 | 5.71563 | 2.83784 |
| C | -1.77887 | 4.92568 | 3.25557 |
| H | -3.06871 | 2.50155 | 4.33807 |
| H | -1.79638 | 0.49916 | 5.05124 |
| H | 0.68861  | 0.44689 | 4.88048 |
| H | -0.52328 | 5.99747 | 1.77847 |

|   |          |         |         |
|---|----------|---------|---------|
| H | -0.39827 | 6.65225 | 3.39687 |
| O | 1.87854  | 5.03173 | 2.92937 |
| O | 2.14708  | 2.48383 | 3.94231 |
| H | 2.37590  | 4.22388 | 3.21781 |
| H | -2.34567 | 5.44260 | 4.03562 |
| H | -2.46963 | 4.78701 | 2.41856 |

23

38

|   |          |          |          |
|---|----------|----------|----------|
| C | -2.32500 | -0.67032 | -0.01693 |
| C | -0.92886 | -0.71495 | -0.01669 |
| C | -0.22402 | -1.94953 | -0.01693 |
| C | -1.09312 | -3.09813 | -0.01735 |
| C | -2.54091 | -3.04457 | -0.01759 |
| C | -3.15581 | -1.79503 | -0.01740 |
| H | -2.79439 | 0.30837  | -0.01678 |
| H | -0.35452 | 0.20402  | -0.01631 |
| H | -4.23267 | -1.68240 | -0.01759 |
| C | -0.65150 | -4.44923 | -0.01766 |
| C | -1.78878 | -5.26388 | -0.01804 |
| C | -1.94598 | -6.66514 | -0.01847 |
| C | -3.21170 | -7.17719 | -0.01888 |
| C | -4.36504 | -6.32745 | -0.01889 |
| C | -4.25530 | -4.96699 | -0.01847 |
| C | -2.96876 | -4.38393 | -0.01806 |
| H | -1.07516 | -7.30925 | -0.01850 |
| H | -3.36022 | -8.25078 | -0.01923 |
| H | -5.34626 | -6.78819 | -0.01924 |
| H | -5.13862 | -4.33924 | -0.01845 |
| O | 0.62171  | -4.80145 | -0.01756 |
| O | 1.02031  | -2.13323 | -0.01663 |
| H | 1.13908  | -3.95240 | -0.01731 |

29

39

|   |          |          |          |
|---|----------|----------|----------|
| C | -2.48668 | -0.76701 | 0.14017  |
| C | -1.07642 | -0.76935 | 0.16248  |
| C | -0.30665 | -1.97874 | 0.08696  |
| C | -1.09990 | -3.15143 | -0.01062 |
| C | -2.50468 | -3.15582 | -0.03341 |
| C | -3.22351 | -1.93189 | 0.04387  |
| H | -3.00287 | 0.18453  | 0.20098  |
| H | -0.53670 | 0.16836  | 0.23907  |
| H | -4.30631 | -1.91062 | 0.02817  |

|   |          |           |          |
|---|----------|-----------|----------|
| C | -0.61957 | -4.47010  | -0.09878 |
| C | -1.73880 | -5.35973  | -0.18123 |
| C | -1.85150 | -6.71866  | -0.28174 |
| C | -3.14155 | -7.31713  | -0.34584 |
| C | -4.31548 | -6.50031  | -0.30533 |
| C | -4.17977 | -5.09258  | -0.20095 |
| C | -2.93103 | -4.52925  | -0.14005 |
| H | -0.96930 | -7.34880  | -0.31341 |
| H | -5.07283 | -4.47604  | -0.17040 |
| O | 0.66140  | -4.79282  | -0.10179 |
| O | 0.95302  | -2.04595  | 0.10218  |
| H | 1.16014  | -3.93949  | -0.03252 |
| C | -4.55363 | -9.28001  | -0.51097 |
| C | -5.70734 | -8.47683  | -0.47110 |
| C | -5.58483 | -7.11365  | -0.37015 |
| C | -3.30278 | -8.71246  | -0.44976 |
| H | -4.65261 | -10.35676 | -0.59074 |
| H | -6.68790 | -8.93545  | -0.52009 |
| H | -6.47022 | -6.48676  | -0.33879 |
| H | -2.41888 | -9.34063  | -0.48124 |

19

40

|   |          |          |          |
|---|----------|----------|----------|
| C | -2.43488 | -0.61421 | 0.14956  |
| C | -1.03303 | -0.79033 | 0.15080  |
| C | -0.44765 | -2.06750 | 0.07223  |
| C | -1.32977 | -3.23411 | -0.01285 |
| C | -2.69483 | -3.03398 | -0.01242 |
| C | -3.25037 | -1.71942 | 0.06934  |
| H | -2.85670 | 0.38117  | 0.21132  |
| H | -0.35937 | 0.05611  | 0.21300  |
| H | -4.32850 | -1.61161 | 0.06666  |
| C | -0.73630 | -4.52677 | -0.09235 |
| O | 0.55744  | -4.73365 | -0.09602 |
| O | 0.81564  | -2.24824 | 0.07205  |
| H | 0.97374  | -3.79940 | -0.03015 |
| H | -3.36114 | -3.88566 | -0.07494 |
| O | -1.52327 | -5.58929 | -0.16788 |
| C | -0.90454 | -6.87564 | -0.24667 |
| H | -1.72529 | -7.58514 | -0.29789 |
| H | -0.28258 | -6.94634 | -1.13852 |
| H | -0.29434 | -7.06084 | 0.63679  |

25

| 41 |          |          |          |
|----|----------|----------|----------|
| C  | 0.36993  | -2.78728 | -0.05890 |
| C  | -1.04278 | -2.77167 | -0.16404 |
| C  | -1.77927 | -1.65998 | 0.16775  |
| C  | -1.07061 | -0.55014 | 0.65443  |
| C  | 0.32316  | -0.54072 | 0.74961  |
| C  | 1.06040  | -1.65684 | 0.39384  |
| C  | 0.75223  | -4.07694 | -0.48470 |
| C  | -0.46947 | -4.75509 | -0.80512 |
| H  | -1.62776 | 0.33043  | 0.95094  |
| H  | 0.82499  | 0.34948  | 1.10962  |
| H  | 2.14229  | -1.65461 | 0.46961  |
| H  | 1.75103  | -4.48393 | -0.54978 |
| H  | -3.47920 | -3.33384 | 1.14799  |
| C  | -3.26118 | -1.63072 | 0.01389  |
| C  | -3.93228 | -0.76744 | -0.78693 |
| C  | -5.34523 | -0.77081 | -0.85777 |
| H  | -3.35860 | -0.06476 | -1.37799 |
| C  | -5.35752 | -2.58522 | 0.72391  |
| C  | -6.03359 | -1.71679 | -0.07184 |
| H  | -5.87306 | -0.08292 | -1.50091 |
| H  | -5.83702 | -3.33214 | 1.33906  |
| H  | -7.11532 | -1.77034 | -0.09259 |
| N  | -1.53186 | -4.01659 | -0.62337 |
| N  | -3.97132 | -2.52306 | 0.81266  |
| H  | -0.55153 | -5.77550 | -1.15862 |

| 17 |          |          |          |
|----|----------|----------|----------|
| 42 |          |          |          |
| C  | -1.95447 | -0.21702 | 0.05994  |
| C  | 0.07993  | 1.02531  | -0.16787 |
| C  | -1.98121 | 2.18319  | 0.04936  |
| C  | -2.66392 | 0.99188  | 0.13029  |
| H  | -3.74220 | 0.97999  | 0.24747  |
| C  | -2.52825 | -1.58887 | 0.12971  |
| H  | -3.61090 | -1.53885 | 0.24718  |
| H  | -2.31452 | -2.16769 | -0.77591 |
| H  | -2.12417 | -2.15827 | 0.97431  |
| C  | -2.60660 | 3.53592  | 0.10952  |
| H  | -2.39915 | 4.10768  | -0.80074 |
| H  | -3.68751 | 3.45986  | 0.22732  |
| H  | -2.20931 | 4.11772  | 0.94749  |
| N  | -0.60037 | 2.15538  | -0.10044 |
| N  | -0.59331 | -0.08050 | -0.08864 |

|   |         |         |          |
|---|---------|---------|----------|
| S | 1.82490 | 0.98863 | -0.35732 |
| H | 1.93107 | 2.33032 | -0.37620 |

|    |          |          |          |
|----|----------|----------|----------|
| 28 |          |          |          |
| 43 |          |          |          |
| C  | -4.87036 | -3.39266 | 0.20018  |
| C  | -3.50603 | -3.32622 | 0.10648  |
| C  | -2.83667 | -2.09291 | 0.02886  |
| C  | -3.56587 | -0.87024 | 0.07760  |
| C  | -4.99448 | -0.97486 | 0.08492  |
| C  | -5.60895 | -2.20208 | 0.16225  |
| C  | -1.41891 | -2.05760 | -0.12574 |
| C  | -2.82592 | 0.34635  | 0.10704  |
| C  | -1.43630 | 0.36561  | -0.11650 |
| C  | -0.75535 | -0.88777 | -0.23778 |
| C  | -0.74671 | 1.58596  | -0.19328 |
| H  | 0.31944  | 1.58544  | -0.37644 |
| C  | -1.44477 | 2.79447  | -0.02327 |
| C  | -2.76748 | 2.77442  | 0.27503  |
| H  | -0.88350 | -2.99966 | -0.17314 |
| H  | -5.38080 | -4.34512 | 0.26999  |
| H  | -2.91415 | -4.23538 | 0.08626  |
| H  | -6.69208 | -2.24998 | 0.16185  |
| H  | 0.31862  | -0.87283 | -0.38677 |
| H  | -0.93716 | 3.74666  | -0.10664 |
| H  | -3.35708 | 3.66036  | 0.45937  |
| N  | -3.44555 | 1.57366  | 0.36447  |
| C  | -5.89512 | 0.19326  | -0.13847 |
| H  | -4.29180 | 1.58292  | 0.90155  |
| C  | -6.67304 | 0.71631  | 0.89949  |
| N  | -7.27210 | 1.15231  | 1.78732  |
| C  | -6.06076 | 0.72536  | -1.42095 |
| N  | -6.17241 | 1.15875  | -2.48646 |
